# Supplementary material for: Distinct co-expression networks using multi-omic data reveal novel interventional targets in HPV-positive and negative head-and-neck squamous cell cancer
Source: PubMed Central journal article supplement (PMC6189122; doi:10.1038/s41598-018-33498-5), 2018-10-15
Supplement: 41598_2018_33498_MOESM1_ESM.pdf [file 41598_2018_33498_MOESM1_ESM.pdf]

SUPPLEMENTAL MATERIALS

**Distinct co-expression networks using multi-omic data reveal novel interventional targets in HPV-positive and negative head-and-neck squamous cell cancer**

**Raquel L. Costa<sup>1,2</sup>, Mariana Boroni<sup>2</sup>, Marcelo A. Soares<sup>1,3</sup>**

**Author Affiliations:**

<sup>1</sup>Programa de Oncovirologia, Instituto Nacional de Câncer, Rio de Janeiro, Brazil

<sup>2</sup>Bioinformatics and Computational Biology Lab, Instituto Nacional de Câncer, Rio de Janeiro, Brazil

<sup>3</sup>Department of Genetics, Universidade Federal do Rio de Janeiro, Rio de Janeiro, Brazil

#Corresponding Authors: [quelopes@incc.br](mailto:quelopes@incc.br)

Conflict of Interest: The authors have declared that no conflict of interest exists.

**This file includes Supplementary Figures 1-7 and Supplementary Tables 1 and 2**

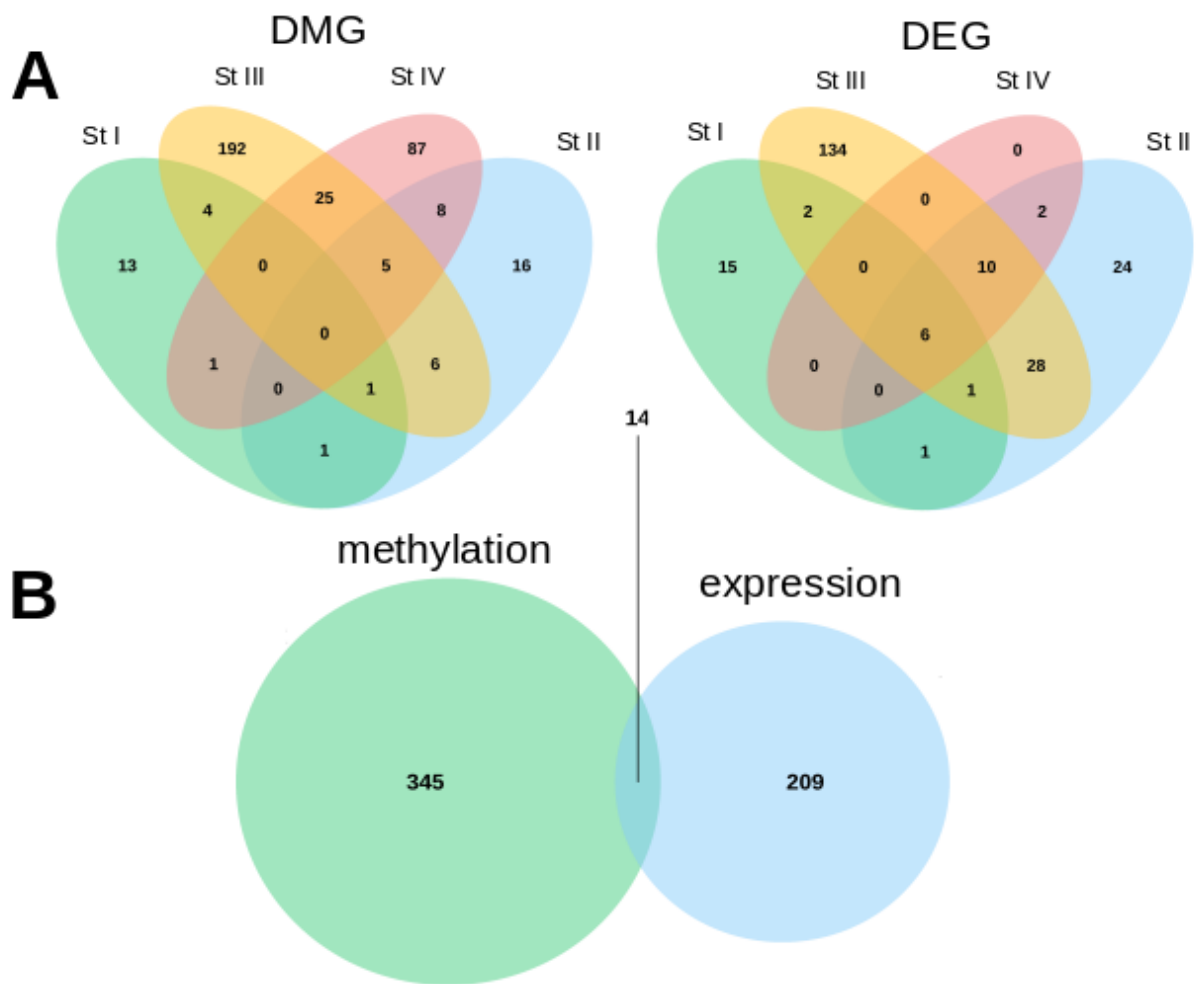

**Supplementary Figure 1.** In (A) Venn diagrams showing the number of selected genes with differential methylation (DMG; left panels) and expression (DEG; right panels) profiles between HPV+ and HPV- tumor samples. DEG and DMG are stratified by tumor stages (st I to IV, represented by distinct colors), respectively. In (B), the overlap of genes selected in A by differential methylation and expression among HPV+ versus HPV- is shown.

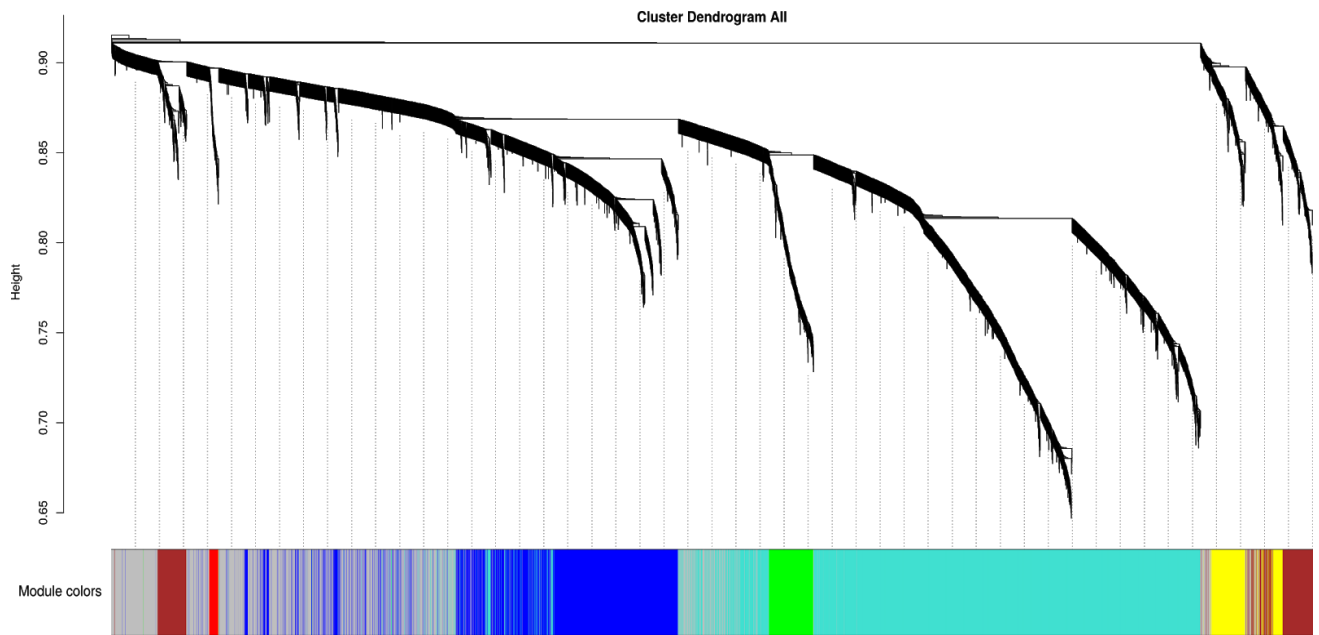

**Supplementary Figure 2.** Gene clustering dendrogram showing co-expressed genes hierarchically clustered into modules, which were defined by different colors (rectangle at bottom).

## Soft threshold, expression data

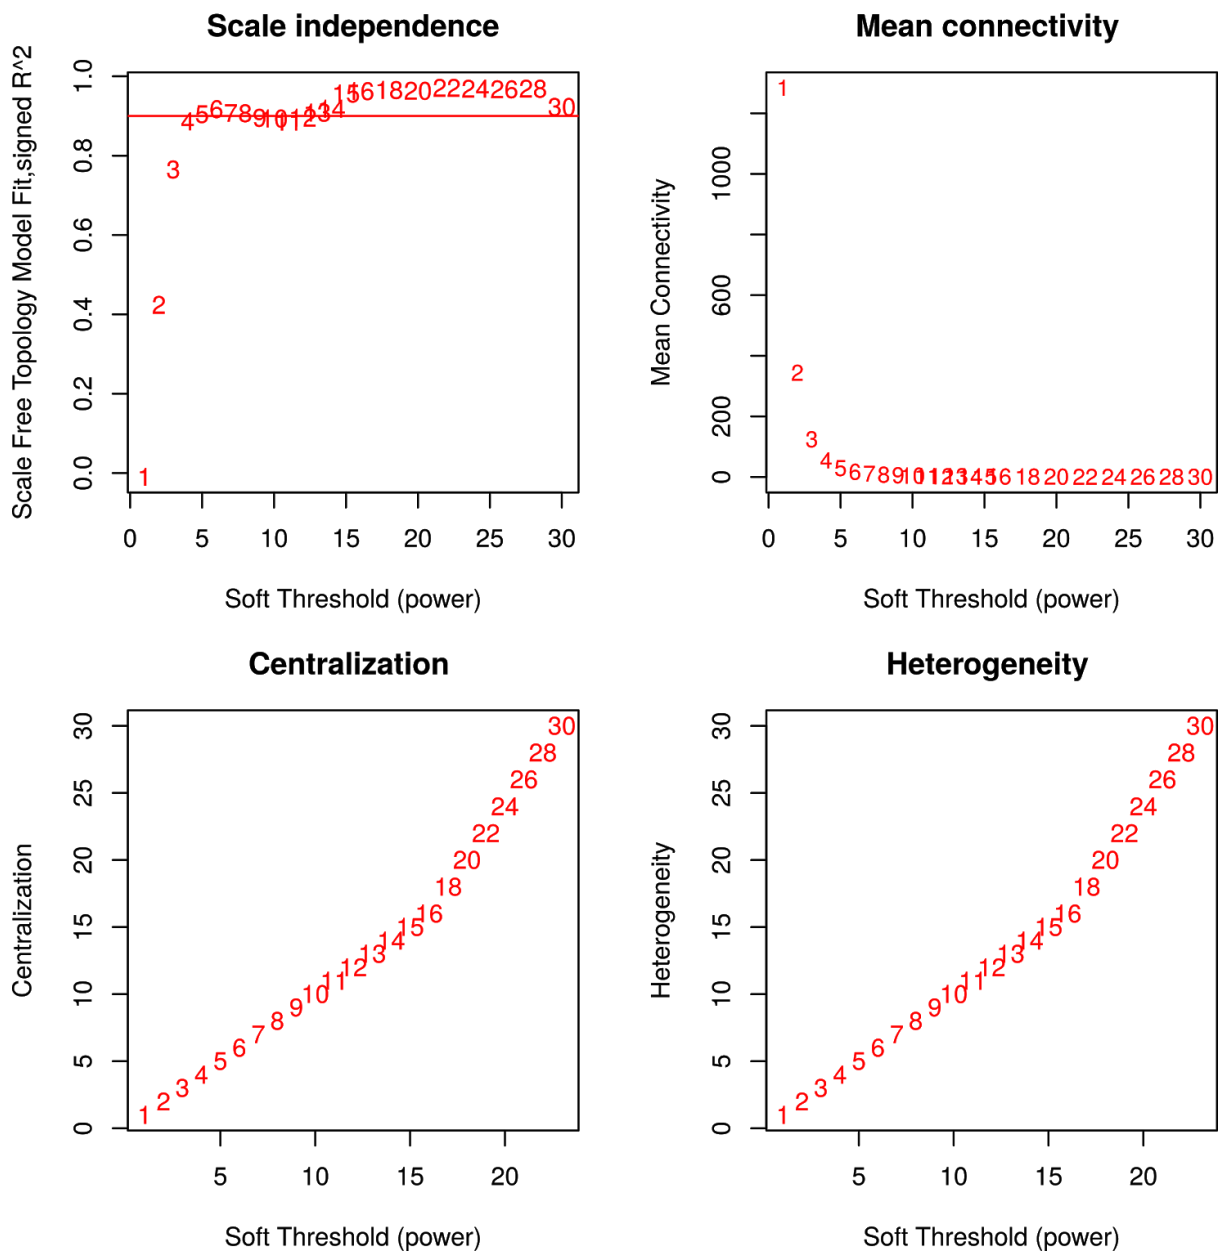

**Supplementary Figure 3.** Scatter plot of network topology analysis using a range of soft-thresholding powers. Top left, scale-free fit index as a function of the soft-thresholding power indicating the soft-thresholding power of 4. The other charts represent the mean connectivity (top right), centralization (bottom left) and heterogeneity (bottom right) (y-axes) versus soft-thresholding power (x-axes).

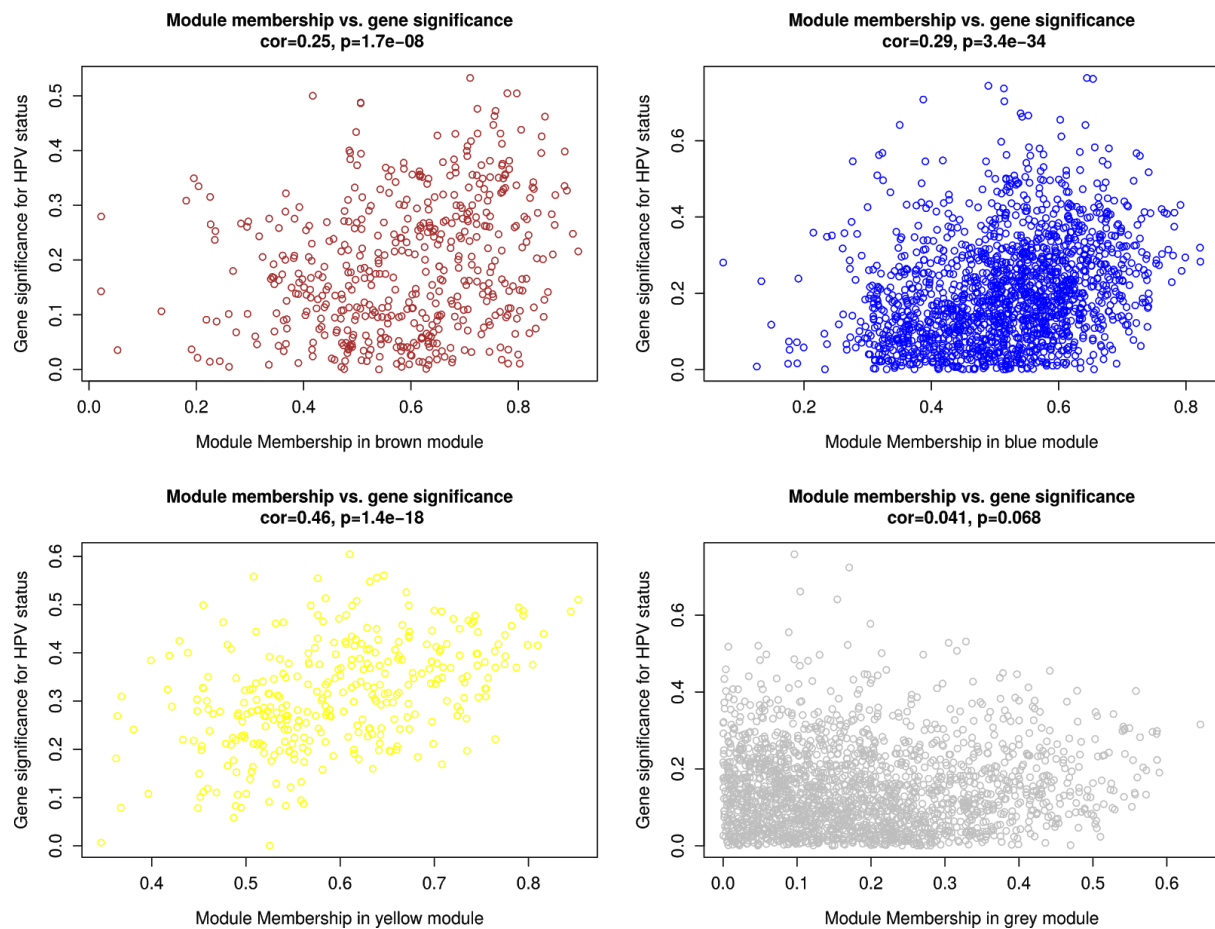

**Supplementary Figure 4.** Scatter plots of gene significance (y-axis) versus module membership (x-axis) for HPV-status associated with selected modules with the largest significance when comparing HPV+ and HPV- samples (*Brown, Blue, Yellow* and *Grey*).

### Sample dendrogram, expression data

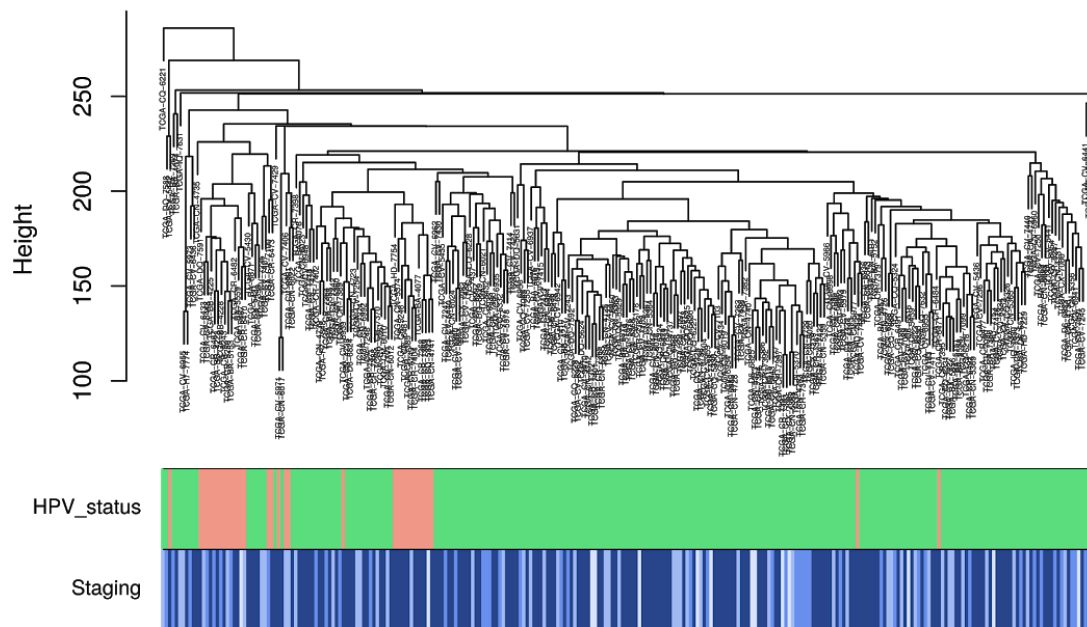

### Sample dendrogram, methylation data

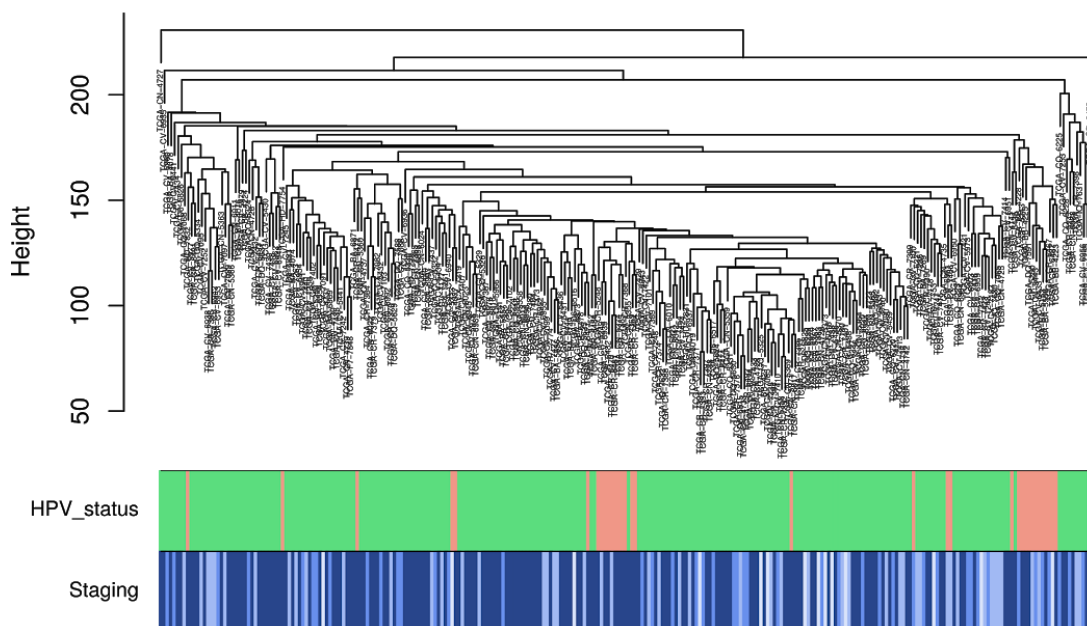

#### Legend

- HPV-
- HPV+
- St I
- St II
- St III
- St IV

**Supplementary Figure 5.** Hierarchical clustering of the expression (top panel) and methylation (bottom panel) data of the samples with respect to HPV status or disease staging (horizontal bars at the bottom of each dendrogram, color-labeled according to the legend at the bottom of the Figure).

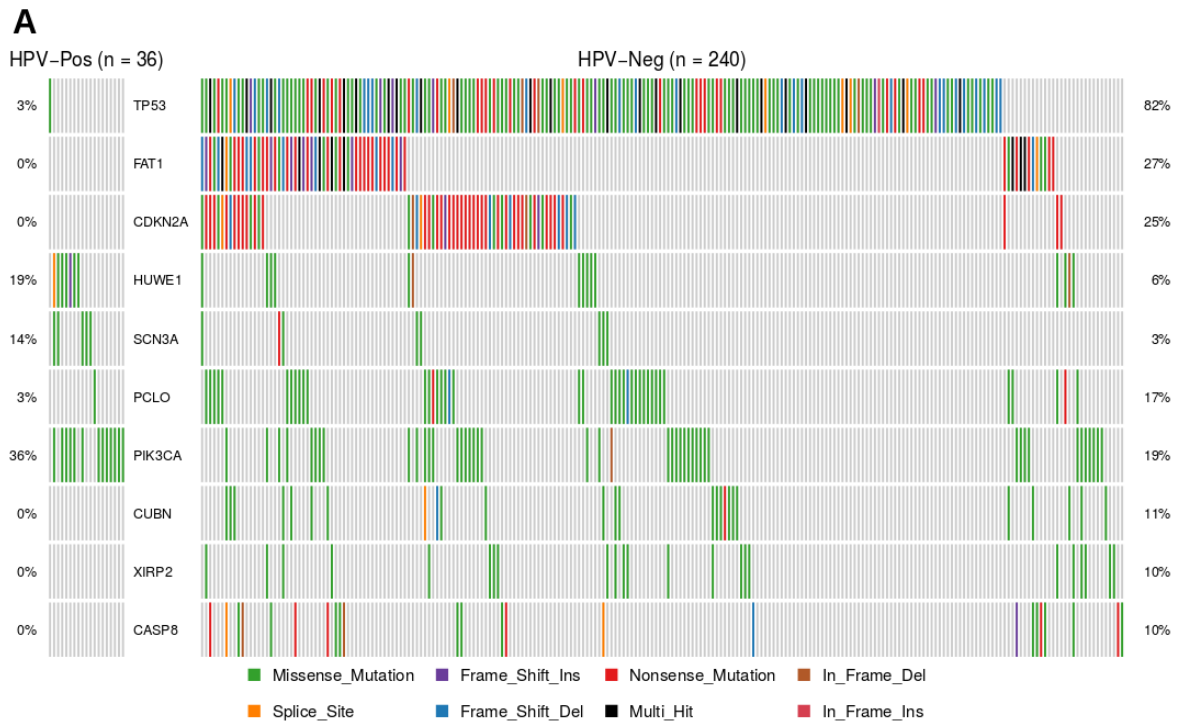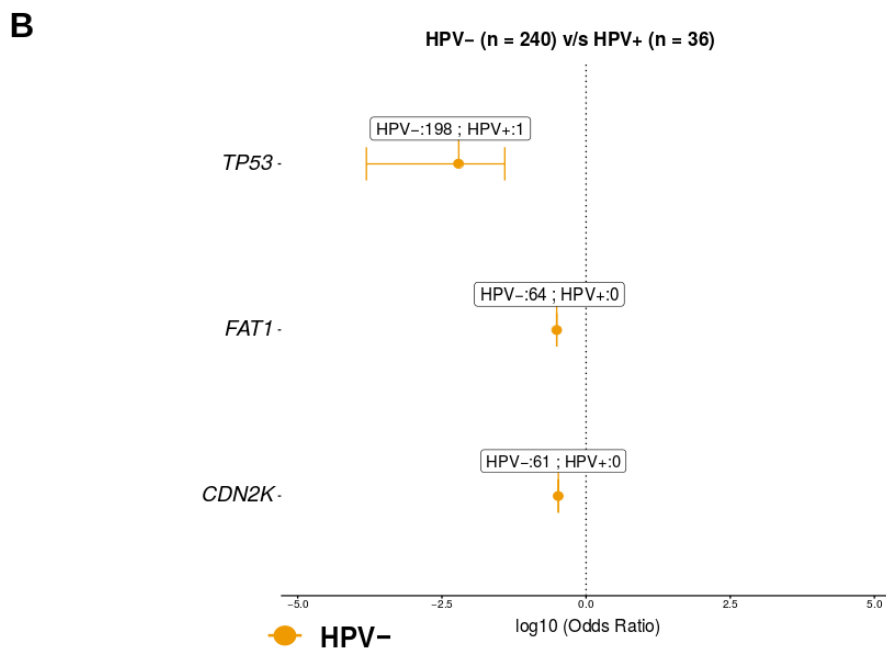

**Supplementary Figure 6.** (A) Top 10 frequently mutated genes in HPV+ (n = 36) and HPV- (n = 240) HNSCC cases, sorted according to their frequency in the latter. Each case is represented by a single column in both the HPV+ and HPV- graphs. Relative mutation frequencies are shown at the left of the HPV+ graph and at the right of the HPV- graph. Types of mutations found in each gene were color-coded according to the legend at the bottom of the Figure. (B) Forest plot showing the odds ratio (OR) of the significantly mutated genes using the Fisher's exact test (FDR-adjusted  $\leq 0.05$ ). Only three genes (*TP53*, *FAT1* and *CDKN2A*) were retrieved with significance, all found in HPV- cases. Values are plotted in a log<sub>10</sub> scale.

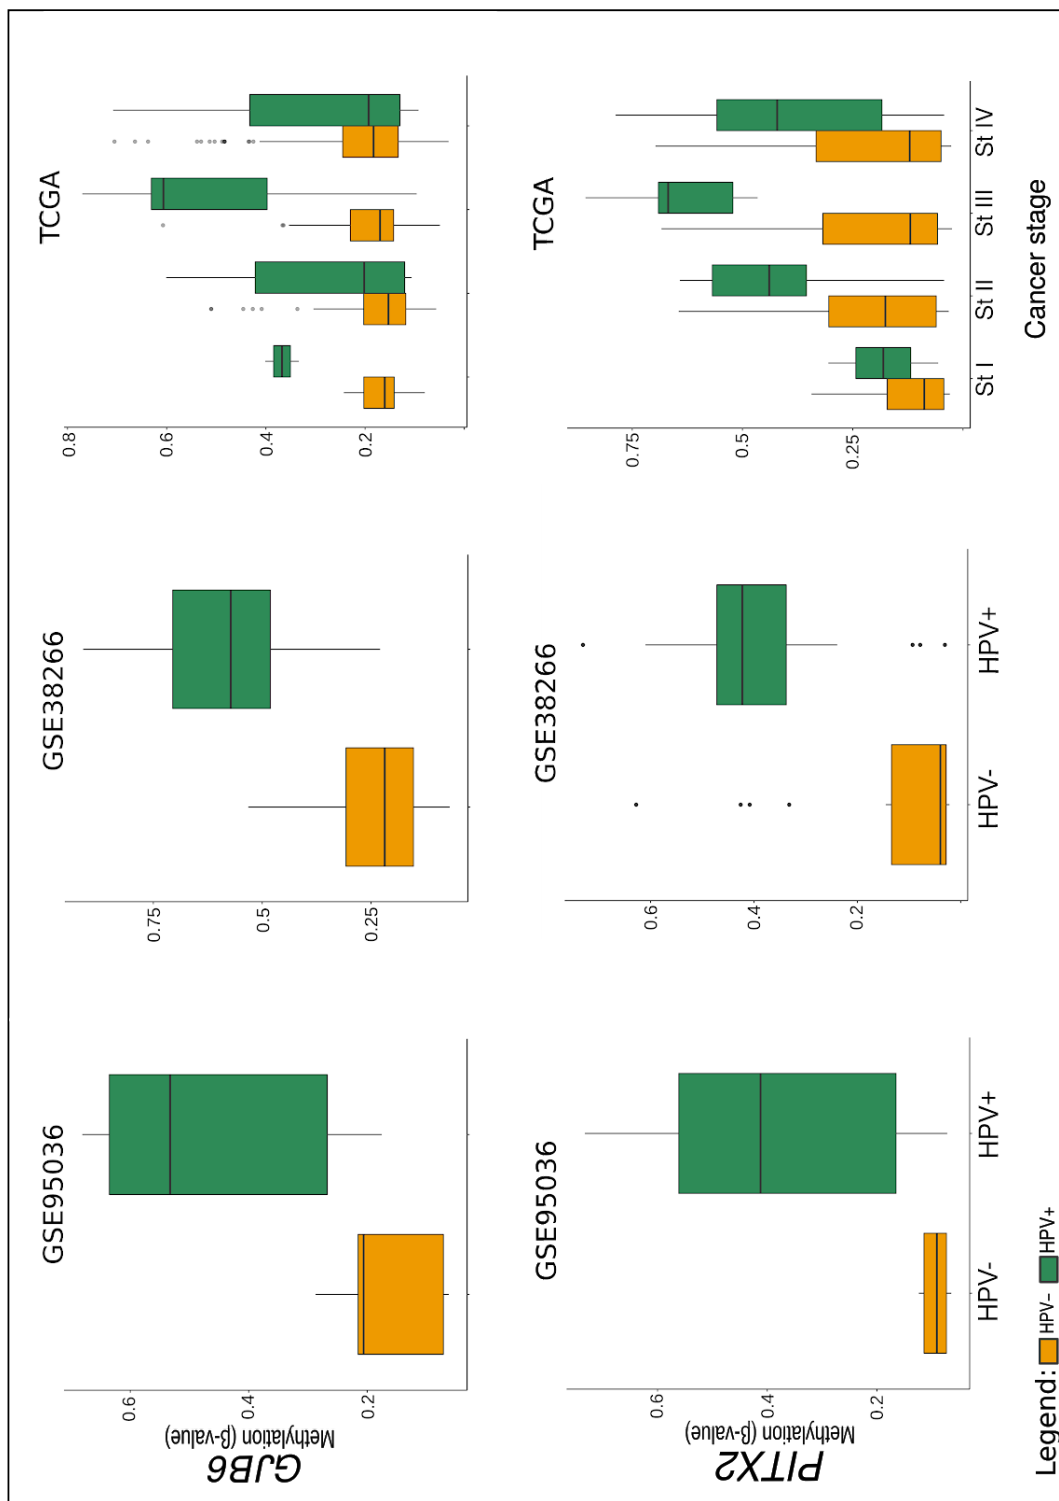

**Supplementary Figure 7.** Differences in methylation levels of the *GJB6* and *PITX2* gene promoter regions (TS200) between HPV- and HPV+ samples. The left and central panels show data from the external high-throughput experiments deposited under GEO: GSE95036 and GEO: GSE38266. The right panels show the TCGA dataset evaluated in each stage (I–IV). Differences were calculated comparing HPV+ and HPV- samples.



**Supplementary Table 1.** Differentially methylated and expressed genes (DMG and DEG, respectively) comparing HPV+ and HPV- HNSCC per tumor stage (I to IV). Genes were selected by moderated t-tests, and only those with significant p-values are shown. Adjusted p-values using FDR ( $\leq 0.01$ ) are also presented. Absolute log fold-change (logFC) values between HPV+ and HPV- are also shown.

**DMG\_St\_I**

| Genes   | logFC        | p-values | Adjusted p-values |
|---------|--------------|----------|-------------------|
| ZNF442  | 5.158756126  | 3.94E-11 | 2.93E-07          |
| CLSTN1  | 3.136343742  | 5.23E-06 | 0.004789876366    |
| ATP5G2  | 2.291999017  | 1.15E-06 | 0.001547456852    |
| SFMBT2  | 3.519761261  | 8.92E-07 | 0.001324891273    |
| RNLS    | 3.640967357  | 6.08E-08 | 0.0001291392984   |
| BEST3   | 2.300476142  | 1.59E-06 | 0.001814231139    |
| DLC1    | 4.594633477  | 5.48E-06 | 0.004789876366    |
| MC4R    | 3.785723484  | 3.75E-07 | 0.0006188692666   |
| MEI1    | -2.670095559 | 3.92E-06 | 0.003886294066    |
| ZNF417  | 4.89254455   | 7.14E-08 | 0.0001326125334   |
| CDH26   | -2.761310628 | 6.37E-06 | 0.005261475335    |
| SIPA1L2 | -3.850375945 | 2.62E-06 | 0.002783699841    |
| C2orf74 | 4.343065216  | 2.26E-10 | 1.12E-06          |
| ALDH7A1 | 4.574776481  | 1.44E-06 | 0.00178452425     |
| ZNF708  | 4.127774578  | 9.91E-06 | 0.00775022812     |
| ZNF563  | 5.732553649  | 5.75E-12 | 8.54E-08          |
| INPP5F  | -2.022160418 | 1.27E-05 | 0.009433636238    |
| ZNF530  | 2.81449348   | 2.76E-08 | 6.83E-05          |
| ZNF443  | 3.102004449  | 2.10E-08 | 6.25E-05          |
| PNLDC1  | -4.767805931 | 1.46E-09 | 5.41E-06          |

**DMG\_St\_II**

| Genes     | logFC        | p-values | Adjusted p-values |
|-----------|--------------|----------|-------------------|
| PRR5L     | -2.149719898 | 3.83E-09 | 1.14E-05          |
| STC1      | 3.083085926  | 4.67E-05 | 0.009468975543    |
| C14orf162 | -3.12341548  | 2.54E-07 | 0.0003436654306   |
| ACSM1     | 2.461732986  | 1.90E-06 | 0.001554514968    |
| OR6K2     | 2.200172572  | 3.62E-05 | 0.00861396541     |
| ZNF772    | 3.318661585  | 2.22E-06 | 0.001650595534    |
| SERINC4   | -2.97411914  | 7.78E-06 | 0.003210739511    |
| C22orf45  | -2.912744449 | 2.70E-05 | 0.006788846072    |

|           |              |          |                 |
|-----------|--------------|----------|-----------------|
| ZNF440    | 2.901419949  | 2.29E-09 | 8.53E-06        |
| ZNF211    | 2.64034814   | 1.39E-07 | 0.0002589396622 |
| ZNF773    | 3.203902445  | 1.52E-06 | 0.001462471011  |
| TMCO5A    | 2.932620845  | 1.26E-06 | 0.001340730272  |
| GCNT2     | 2.102696746  | 1.19E-05 | 0.004118946997  |
| RERGL     | 2.64609432   | 3.39E-08 | 7.21E-05        |
| GRAMD4    | -4.311599826 | 3.07E-05 | 0.007614373913  |
| HSF4      | -3.828352066 | 4.77E-09 | 1.18E-05        |
| PKD1      | -2.208481486 | 1.89E-05 | 0.005213174203  |
| GZMA      | 3.000892832  | 3.84E-05 | 0.00865728557   |
| LSAMP     | 3.622056477  | 4.19E-06 | 0.002009104736  |
| DHX40     | -2.92570013  | 2.81E-06 | 0.001894100302  |
| HIST1H3C  | 3.563760575  | 1.49E-05 | 0.00490934281   |
| ZNF419    | 2.519081385  | 6.44E-07 | 0.0007980057928 |
| COL29A1   | 2.815664502  | 3.91E-06 | 0.002009104736  |
| APOL6     | 2.506531756  | 2.10E-05 | 0.005681644903  |
| MEI1      | -3.217606854 | 5.50E-10 | 8.18E-06        |
| APOL2     | 2.003645112  | 1.67E-06 | 0.001462471011  |
| LOC375196 | -3.462005372 | 1.59E-05 | 0.005016294385  |
| DERL3     | -4.020534508 | 4.91E-05 | 0.009721531514  |
| HIST1H2BE | 3.217815736  | 4.19E-06 | 0.002009104736  |
| ZFR2      | -2.881044495 | 4.48E-06 | 0.00207989787   |
| EDIL3     | 2.504075615  | 3.00E-06 | 0.001894100302  |
| C2orf74   | 2.810332578  | 3.57E-05 | 0.00861396541   |
| MMP3      | 3.492328251  | 4.32E-05 | 0.00925029035   |
| TNP1      | 2.546401604  | 1.19E-05 | 0.004118946997  |
| SYCP2     | -5.232800781 | 1.70E-09 | 8.53E-06        |
| HIST1H2BB | 3.864746321  | 2.03E-09 | 8.53E-06        |
| GPR150    | -3.455379159 | 3.78E-06 | 0.002009104736  |

**DMG\_St\_III**

| Genes     | logFC        | p-values | Adjusted p-values |
|-----------|--------------|----------|-------------------|
| GJB6      | 2.060642427  | 4.94E-05 | 0.003599463279    |
| LOC401463 | 3.543586023  | 1.52E-05 | 0.00157287264     |
| PTPN22    | 3.371589943  | 4.36E-05 | 0.00333672898     |
| GABRA1    | 2.985312139  | 7.87E-07 | 0.0001646450567   |
| RFXAP     | 2.344236627  | 3.68E-05 | 0.002969034373    |
| PRR5L     | -2.383109851 | 2.70E-06 | 0.0004454329214   |

|               |              |                 |                 |
|---------------|--------------|-----------------|-----------------|
| FGF10         | 2.952733565  | 2.37E-05        | 0.002243215581  |
| STMN2         | 2.188439523  | 3.17E-05        | 0.002687442878  |
| ZNF536        | 2.162945864  | 0.0001542311617 | 0.008681929142  |
| STC1          | 4.864331569  | 2.72E-10        | 3.37E-07        |
| HTR1E         | 2.755091675  | 4.72E-06        | 0.0006680721691 |
| CTXN2         | 2.222149707  | 7.84E-08        | 2.43E-05        |
| KMO           | 2.596493738  | 3.41E-06        | 0.0005282921161 |
| PDE1B         | 2.666365075  | 3.40E-08        | 1.20E-05        |
| ZNF442        | 4.030364877  | 2.66E-10        | 3.37E-07        |
| ATP8B4        | 4.344192196  | 4.27E-06        | 0.0006226531509 |
| SLC13A1       | 2.698241575  | 5.35E-05        | 0.003844398546  |
| CECR2         | 3.451577981  | 2.96E-05        | 0.002601991861  |
| NRSN1         | 3.006781304  | 4.32E-06        | 0.0006226531509 |
| DKFZp566F0947 | 4.029351481  | 0.0001698016129 | 0.009346006554  |
| KIF6          | 4.612134351  | 6.65E-08        | 2.15E-05        |
| F2RL1         | 4.240102582  | 8.91E-07        | 0.0001720310784 |
| RECK          | 4.355765487  | 1.35E-06        | 0.0002471998968 |
| FRMD5         | 2.164940959  | 0.0001371830506 | 0.008058013105  |
| ZNF441        | 2.41972046   | 3.84E-05        | 0.003036403352  |
| LAIR1         | 3.80430294   | 1.86E-05        | 0.001843484519  |
| NTSR1         | 4.090850114  | 8.74E-06        | 0.001031211187  |
| HSPC157       | 2.391100594  | 1.10E-06        | 0.0002035347247 |
| NEFL          | 4.973910082  | 2.25E-09        | 1.52E-06        |
| PITX2         | 3.527734568  | 1.95E-05        | 0.001921256235  |
| A2LD1         | -2.476424    | 0.0001635725751 | 0.009070343426  |
| DPPA2         | 4.010208259  | 2.95E-05        | 0.002601991861  |
| TRAM1L1       | 3.898366223  | 1.63E-05        | 0.001644603555  |
| MIR548F5      | 2.966611336  | 1.70E-06        | 0.0003001000126 |
| CRYM          | 2.630109983  | 1.83E-08        | 7.56E-06        |
| OSM           | -2.200827573 | 4.00E-05        | 0.003128181708  |
| AGPAT4        | 2.35991063   | 4.51E-05        | 0.00336720798   |
| PRR23B        | 2.112325418  | 0.0001178155083 | 0.007264963769  |
| F2R           | 4.215035496  | 3.75E-09        | 2.32E-06        |
| OR6K2         | 2.985464568  | 0.0001354932442 | 0.007990337707  |
| ZNF772        | 3.513197876  | 2.69E-08        | 9.75E-06        |
| KRTAP12-3     | 2.090137942  | 0.0001539396444 | 0.008681929142  |
| EMB           | 3.080349167  | 1.81E-05        | 0.001805672489  |
| CPPED1        | 2.466150822  | 3.35E-05        | 0.002766986709  |

|          |              |                 |                 |
|----------|--------------|-----------------|-----------------|
| CD80     | 2.947407997  | 1.58E-07        | 4.60E-05        |
| PTPN4    | 2.66461417   | 2.98E-05        | 0.002606089159  |
| LPPR1    | 2.796137255  | 2.72E-05        | 0.002482561804  |
| PCDH15   | 3.651966734  | 8.56E-07        | 0.0001718253607 |
| SCARA5   | 3.615260084  | 0.0001476469003 | 0.00844962235   |
| OR2G2    | 3.03320272   | 0.0001331328535 | 0.00794573227   |
| GLIPR1L1 | 3.402288284  | 4.89E-14        | 7.26E-10        |
| C5AR1    | 2.114230077  | 8.18E-06        | 0.001004048786  |
| KCNF1    | 2.138535824  | 7.34E-06        | 0.0009480713901 |
| KIF2B    | 2.635519203  | 1.97E-05        | 0.001923803582  |
| HOXC11   | 4.453442362  | 3.82E-05        | 0.003035819807  |
| FBXO16   | 2.989205925  | 5.97E-05        | 0.004207530309  |
| DYNC111  | 2.742034394  | 9.18E-07        | 0.0001749585973 |
| PAG1     | 3.052975134  | 1.42E-09        | 1.17E-06        |
| SLCO1C1  | 3.432934305  | 1.37E-05        | 0.001435878717  |
| UGT8     | 4.300412615  | 9.78E-06        | 0.00113530489   |
| SCGN     | 2.563194089  | 1.53E-05        | 0.00157287264   |
| PAM      | 4.14672067   | 6.06E-11        | 1.29E-07        |
| KIR3DX1  | 3.116702707  | 8.39E-07        | 0.0001708387864 |
| SEMA3E   | 6.026272065  | 2.71E-13        | 2.02E-09        |
| GREM2    | 4.233889373  | 5.97E-08        | 1.97E-05        |
| GCNT2    | 2.485030127  | 2.90E-05        | 0.00259986523   |
| PDX1     | 4.439952727  | 3.27E-05        | 0.00272778453   |
| C19orf45 | 4.035975666  | 2.20E-08        | 8.40E-06        |
| TOX2     | 2.449314504  | 8.69E-07        | 0.0001720310784 |
| IL18     | 3.116372518  | 7.28E-05        | 0.004985763847  |
| GRAMD4   | -5.241043467 | 7.77E-07        | 0.0001646450567 |
| ABCC13   | 3.694943658  | 0.0001140627875 | 0.007092414582  |
| SLC38A11 | 4.111187036  | 3.51E-05        | 0.002879336776  |
| C17orf77 | 3.135242285  | 4.50E-06        | 0.0006423550929 |
| PLXNA1   | -4.142020011 | 1.04E-06        | 0.0001959489033 |
| FAM19A2  | 3.222387151  | 8.56E-10        | 8.48E-07        |
| CHST8    | 3.51315117   | 3.01E-05        | 0.002619161139  |
| ZNF273   | 2.209202915  | 1.75E-06        | 0.0003066568872 |
| HSF4     | -3.627813191 | 1.36E-08        | 6.14E-06        |
| ARPP-21  | 3.141534669  | 1.25E-08        | 5.83E-06        |
| ZDBF2    | 2.979754605  | 2.02E-07        | 5.28E-05        |
| C16orf45 | 2.61272456   | 6.21E-06        | 0.0008245601514 |

|           |              |                 |                 |
|-----------|--------------|-----------------|-----------------|
| PRMT8     | 3.579602183  | 0.0001496167667 | 0.008486468587  |
| MIR1323   | 2.238976791  | 1.39E-05        | 0.001449645895  |
| FAM169A   | 3.494545012  | 8.64E-06        | 0.001026781706  |
| FLRT3     | 3.553995318  | 2.54E-09        | 1.64E-06        |
| TACC2     | -3.542707774 | 1.55E-06        | 0.000277055097  |
| HGF       | 3.19227321   | 1.16E-05        | 0.001298562336  |
| PCDH18    | 2.328625194  | 4.33E-07        | 0.0001006087877 |
| SLC6A5    | 3.445073518  | 7.49E-08        | 2.37E-05        |
| PRDM5     | 3.183293118  | 2.62E-07        | 6.60E-05        |
| SULF1     | 4.567926798  | 1.80E-09        | 1.40E-06        |
| MUL1      | 3.341319051  | 4.80E-06        | 0.0006734258067 |
| MIR1265   | 2.181846302  | 4.46E-05        | 0.003343764555  |
| LPL       | 2.666197796  | 5.16E-06        | 0.0007031246919 |
| ADAM5P    | 2.574432513  | 1.56E-05        | 0.001586101428  |
| ZSWIM2    | 3.776978898  | 1.49E-10        | 2.22E-07        |
| LOC643719 | 3.885406546  | 7.42E-06        | 0.0009480713901 |
| FLJ26850  | 5.400331707  | 1.54E-07        | 4.56E-05        |
| CNTN6     | 2.793315418  | 0.0001228646484 | 0.007483162051  |
| ZNF233    | 3.67632683   | 2.08E-08        | 8.12E-06        |
| ZNF30     | 4.533500822  | 7.80E-10        | 8.28E-07        |
| BTBD11    | 3.972946228  | 8.29E-09        | 4.11E-06        |
| DSCAM     | 2.56061014   | 2.14E-05        | 0.00206216941   |
| HTR3A     | 2.036685499  | 3.09E-05        | 0.002651703465  |
| GJA5      | 2.556595846  | 3.57E-06        | 0.0005476624805 |
| RFTN2     | 3.035385853  | 2.80E-06        | 0.0004520136601 |
| LOC169834 | 4.341641312  | 0.0001303525544 | 0.007842790733  |
| CD44      | 2.279977434  | 1.86E-07        | 5.01E-05        |
| ROBO1     | 3.101059151  | 1.68E-05        | 0.001688557427  |
| TRDMT1    | 3.664544289  | 7.46E-06        | 0.0009480713901 |
| COL29A1   | 2.815868674  | 1.19E-05        | 0.001324619121  |
| GPC5      | 2.850740641  | 9.12E-05        | 0.005943737221  |
| NGF       | 4.456141676  | 1.27E-09        | 1.11E-06        |
| ZNF528    | 3.504554939  | 0.0001025162538 | 0.006510658325  |
| ZNF716    | 3.497419654  | 0.0001600922777 | 0.008944102779  |
| TCTEX1D1  | 2.08734779   | 0.000159625766  | 0.008944102779  |
| SYNPR     | 3.186008427  | 7.94E-05        | 0.005365408446  |
| ZNF788    | 4.324966412  | 3.17E-05        | 0.002687442878  |
| SLC17A6   | 3.35789639   | 3.88E-05        | 0.003053587111  |

|           |              |                 |                 |
|-----------|--------------|-----------------|-----------------|
| LOC283404 | 2.305067473  | 9.83E-05        | 0.006296525491  |
| DIRAS2    | 2.871123817  | 2.76E-05        | 0.002482561804  |
| UGT3A2    | 2.92240738   | 2.70E-05        | 0.002482561804  |
| OLFM3     | 2.229192474  | 6.63E-05        | 0.004645547875  |
| HOXB7     | 4.822217236  | 8.26E-06        | 0.001006142412  |
| SEMA3A    | 2.117509743  | 5.52E-05        | 0.003922289821  |
| MC4R      | 3.233152242  | 7.89E-06        | 0.0009935304087 |
| ZNF552    | 2.714170177  | 2.86E-07        | 7.08E-05        |
| MEI1      | -2.417503705 | 2.43E-05        | 0.002273692671  |
| HCG11     | 2.372323187  | 9.99E-06        | 0.001151007006  |
| CCL23     | 3.367405888  | 1.08E-05        | 0.001217629604  |
| KCNA1     | 3.552686136  | 7.96E-06        | 0.0009939054388 |
| HPSE2     | 2.136429471  | 4.10E-05        | 0.003177020831  |
| CLSTN2    | 2.92615083   | 4.93E-06        | 0.0006848068851 |
| SPRR2G    | 2.471534745  | 6.68E-05        | 0.004659941373  |
| NEUROD6   | 2.494335953  | 4.42E-05        | 0.003339903984  |
| DNAH9     | 5.29032835   | 1.39E-10        | 2.22E-07        |
| CST7      | 2.465675337  | 0.0001063129283 | 0.00666631404   |
| IDO2      | 3.369791712  | 8.29E-05        | 0.005572962145  |
| KCNJ3     | 2.961780258  | 1.08E-05        | 0.001217629604  |
| EFCAB1    | 2.087287784  | 2.96E-05        | 0.002601991861  |
| GHR       | 3.521200878  | 6.76E-05        | 0.004674027855  |
| PCDHA1    | 3.503648731  | 0.0001168200056 | 0.007233592095  |
| SPOCK1    | 3.329025369  | 1.09E-09        | 1.01E-06        |
| HERC6     | 2.593990702  | 4.69E-08        | 1.62E-05        |
| CADM2     | 3.009113315  | 0.0001054242556 | 0.006647309223  |
| LUZP2     | 2.775031385  | 0.0001493698337 | 0.008486468587  |
| RSPO2     | 3.145170098  | 4.43E-05        | 0.003339903984  |
| LOC400940 | 3.147051574  | 8.87E-05        | 0.005803657868  |
| ZNF610    | 3.357465194  | 2.75E-05        | 0.002482561804  |
| MIR128-2  | 2.75269963   | 2.43E-05        | 0.002273692671  |
| DMRT1     | 3.120581644  | 0.0001754735191 | 0.009522948106  |
| ERMN      | 2.624359208  | 1.82E-06        | 0.0003144469464 |
| LRRC4C    | 2.183306168  | 0.0001456463719 | 0.008389343923  |
| LRRK2     | 2.954191139  | 8.13E-07        | 0.0001677885752 |
| LIPE      | 3.801500093  | 9.30E-05        | 0.006035226929  |
| XIRP1     | 2.644145311  | 8.42E-05        | 0.005585886024  |
| ZNF114    | 2.813520937  | 4.26E-06        | 0.0006226531509 |

|             |              |                 |                 |
|-------------|--------------|-----------------|-----------------|
| KLHL14      | 3.856715872  | 6.08E-06        | 0.0008137840933 |
| SCAND3      | 3.263834191  | 0.0001437659612 | 0.00835771836   |
| CNTN1       | 3.351288445  | 9.51E-05        | 0.00614481035   |
| NAT1        | 3.504231219  | 7.52E-11        | 1.40E-07        |
| NR1H4       | 3.538869143  | 2.71E-05        | 0.002482561804  |
| EDIL3       | 4.184090564  | 5.24E-10        | 5.99E-07        |
| OR52R1      | 3.295751636  | 8.59E-05        | 0.005646794358  |
| ZNF727      | 2.03335818   | 9.07E-06        | 0.001061546149  |
| OPCML       | 2.644743319  | 4.24E-05        | 0.003265518801  |
| NKD1        | 2.58197507   | 3.95E-07        | 9.47E-05        |
| CMAS        | 2.250230471  | 7.33E-07        | 0.0001578420131 |
| C21orf130   | 2.081875414  | 8.36E-05        | 0.005572962145  |
| CCDC39      | 2.56700149   | 2.09E-09        | 1.48E-06        |
| PER4        | 3.446306136  | 3.65E-05        | 0.002964337206  |
| MMP3        | 4.070810153  | 4.74E-05        | 0.003504272274  |
| CDH18       | 3.916661154  | 2.22E-07        | 5.68E-05        |
| PCDHB6      | 3.669483974  | 5.85E-07        | 0.0001318262658 |
| RAD21L1     | 3.173614602  | 2.65E-08        | 9.75E-06        |
| CDH10       | 3.730546281  | 7.41E-06        | 0.0009480713901 |
| GAS7        | 3.773818643  | 5.36E-09        | 3.06E-06        |
| MIR149      | -2.378544258 | 4.54E-09        | 2.70E-06        |
| TMEM200C    | 2.663179067  | 3.40E-06        | 0.0005282921161 |
| PCDHB13     | 3.386472     | 5.93E-05        | 0.004195848152  |
| PHOX2B      | 3.27120156   | 3.13E-06        | 0.0004951613701 |
| CPLX2       | 2.684534554  | 6.81E-05        | 0.004683823805  |
| LGALS2      | 4.238681957  | 2.02E-08        | 8.12E-06        |
| HMP19       | 4.138464553  | 9.31E-12        | 2.77E-08        |
| SNORD116-21 | 2.793112314  | 2.89E-06        | 0.0004615347275 |
| CHAT        | 2.217509595  | 5.31E-06        | 0.0007170296017 |
| MSX2P1      | 2.91771473   | 4.24E-07        | 0.000100101369  |
| CCL3        | 2.00829752   | 0.0001746152518 | 0.009522948106  |
| ZNF709      | 2.788577373  | 2.07E-06        | 0.0003540726852 |
| RHOJ        | 2.104888257  | 4.68E-07        | 0.0001069252575 |
| MIR1178     | -2.839845062 | 1.40E-08        | 6.14E-06        |
| PAH         | 3.9596904    | 4.31E-11        | 1.07E-07        |
| LMO3        | 3.867730967  | 1.64E-07        | 4.60E-05        |
| STEAP4      | 3.266139594  | 2.19E-06        | 0.0003652641259 |
| GPR139      | 3.637028357  | 4.10E-05        | 0.003177020831  |

|            |              |                 |                 |
|------------|--------------|-----------------|-----------------|
| TNR        | 2.176330731  | 3.25E-05        | 0.002726943965  |
| CPNE4      | 3.828879374  | 1.01E-07        | 3.05E-05        |
| RHOA       | 3.031122589  | 0.0001290758207 | 0.007797543785  |
| EPB41L1    | -2.796474016 | 4.29E-06        | 0.0006226531509 |
| CLEC3A     | 2.082043856  | 2.09E-05        | 0.002030333099  |
| LOC644145  | 3.074939802  | 6.78E-06        | 0.0008916586209 |
| C6orf174   | 3.654325965  | 7.17E-09        | 3.95E-06        |
| NLRP3      | 2.290094177  | 1.37E-05        | 0.001435878717  |
| DPPA3      | 2.78458962   | 8.35E-05        | 0.005572962145  |
| SYCP2      | -6.016384499 | 7.75E-09        | 3.97E-06        |
| MEF2C      | 2.227725807  | 0.0001758351079 | 0.009522948106  |
| PCSK2      | 3.621687625  | 0.0001225795864 | 0.007483162051  |
| MYOD1      | 3.435693508  | 6.04E-07        | 0.0001340003483 |
| PCDHB8     | 3.301165626  | 1.31E-05        | 0.001402690565  |
| NCRNA00159 | 2.748130207  | 0.0001762203573 | 0.009522948106  |
| ALX4       | 6.656591349  | 6.05E-12        | 2.25E-08        |
| CLVS1      | 2.881337317  | 0.0001478300122 | 0.00844962235   |
| FLRT2      | 3.614435754  | 0.0001183470462 | 0.007267584516  |
| ACSS3      | 3.735108703  | 1.06E-05        | 0.001206848193  |
| ZNF257     | 2.867125175  | 8.81E-07        | 0.0001720310784 |
| LRRC3B     | 3.972414337  | 1.96E-09        | 1.46E-06        |
| ZNF563     | 3.882426832  | 1.55E-08        | 6.57E-06        |
| MRGPRE     | 2.433871741  | 5.69E-08        | 1.92E-05        |
| INPP5F     | -2.072016781 | 4.62E-05        | 0.003430209832  |
| ZNF675     | 4.56686822   | 1.27E-05        | 0.001379379153  |
| IRAK1BP1   | 2.349147693  | 1.22E-05        | 0.001337679086  |
| LOC150622  | 2.662451215  | 2.12E-06        | 0.0003587056269 |
| PRDM13     | 3.032173837  | 2.59E-05        | 0.002403586738  |
| GABRG2     | 2.707504333  | 7.52E-09        | 3.97E-06        |
| ZNF493     | 3.812200513  | 3.76E-05        | 0.003003022139  |
| SHC3       | 6.319073355  | 1.84E-12        | 9.12E-09        |
| OR4K2      | 2.149792352  | 3.33E-05        | 0.002762530215  |
| RUNX1T1    | 3.618074845  | 3.64E-06        | 0.0005517988521 |
| OR10G4     | 2.591881025  | 0.0001383701806 | 0.008095745096  |
| CDH12      | 4.008889091  | 3.66E-07        | 8.91E-05        |
| REG1P      | 2.674228768  | 8.39E-06        | 0.001013306963  |
| ABCD2      | 2.714249015  | 1.62E-07        | 4.60E-05        |



## DMG\_St\_IV

| Genes     | logFC        | p-values        | Adjusted p-values |
|-----------|--------------|-----------------|-------------------|
| SPAG17    | 2.288909076  | 4.49E-06        | 0.0002436883657   |
| LIME1     | -2.540170877 | 1.51E-10        | 6.58E-08          |
| C14orf162 | -2.033055407 | 1.08E-09        | 3.15E-07          |
| SLITRK3   | 2.779281279  | 1.81E-06        | 0.0001158645755   |
| PRKCB     | 2.138214     | 2.34E-05        | 0.0008853620325   |
| BCL2L14   | -2.097099238 | 1.96E-06        | 0.0001241072201   |
| GPR98     | 2.102389744  | 3.01E-05        | 0.001097301485    |
| RECK      | 2.317901054  | 6.59E-09        | 1.26E-06          |
| GRM3      | 2.030704113  | 4.29E-07        | 3.68E-05          |
| NTSR1     | 2.044524324  | 6.86E-07        | 5.42E-05          |
| GALM      | 2.151491752  | 3.33E-06        | 0.0001894755105   |
| C7orf58   | 2.298416788  | 2.34E-07        | 2.26E-05          |
| NEFL      | 2.4198455    | 1.34E-09        | 3.62E-07          |
| CDH8      | 2.190037417  | 8.41E-07        | 6.38E-05          |
| RXRG      | 2.270438199  | 1.76E-07        | 1.83E-05          |
| F2R       | 2.699862853  | 8.80E-18        | 3.13E-14          |
| FBXO39    | 2.064984006  | 1.80E-05        | 0.0007153286937   |
| FAM184B   | -2.529434088 | 4.01E-08        | 5.31E-06          |
| MME       | 3.479036245  | 9.10E-09        | 1.61E-06          |
| NCAM1     | 2.167568613  | 5.69E-15        | 8.45E-12          |
| PAK7      | 2.702505799  | 1.26E-07        | 1.35E-05          |
| SERINC4   | -2.205894226 | 1.26E-09        | 3.53E-07          |
| FGF12     | 2.179513333  | 6.03E-05        | 0.001832062814    |
| LOC441177 | 2.265562524  | 9.21E-06        | 0.0004238446712   |
| C22orf45  | -2.58966434  | 2.63E-15        | 4.89E-12          |
| PCDH10    | 2.031149412  | 0.0001913440982 | 0.004194048147    |
| PCDH15    | 2.117551726  | 4.28E-10        | 1.63E-07          |
| ZNF134    | 2.927540766  | 1.06E-09        | 3.15E-07          |
| HOXD1     | 2.157451538  | 3.10E-06        | 0.000178721806    |
| ZNF586    | 2.089934879  | 6.77E-10        | 2.34E-07          |
| ZNF773    | 2.753062219  | 7.57E-17        | 1.61E-13          |
| MYO15B    | -2.486222606 | 3.94E-07        | 3.48E-05          |
| UNC80     | 2.461022074  | 3.63E-07        | 3.29E-05          |
| KCNV1     | 2.670038201  | 1.18E-06        | 8.29E-05          |
| SSTR1     | 2.168464003  | 2.35E-06        | 0.0001450955431   |

|              |              |                 |                 |
|--------------|--------------|-----------------|-----------------|
| GREM2        | 2.945335987  | 1.53E-11        | 1.03E-08        |
| PDX1         | 2.468436613  | 5.10E-07        | 4.24E-05        |
| GRAMD4       | -4.350767879 | 1.07E-17        | 3.13E-14        |
| IRX2         | 2.319867831  | 1.56E-08        | 2.44E-06        |
| CTNND2       | 2.496414142  | 9.38E-05        | 0.002516291301  |
| PCDH20       | 2.151335421  | 1.60E-05        | 0.0006444681743 |
| SLC38A11     | 2.333548323  | 2.07E-07        | 2.01E-05        |
| CHST8        | 2.000422116  | 1.92E-06        | 0.0001223106271 |
| GSX1         | 2.205000679  | 1.10E-05        | 0.0004801997811 |
| HSF4         | -3.613307664 | 1.40E-30        | 2.09E-26        |
| PRMT8        | 2.931267848  | 8.62E-12        | 6.40E-09        |
| LSAMP        | 2.035277361  | 3.94E-06        | 0.0002184748609 |
| CALB1        | 2.07482037   | 1.55E-05        | 0.0006275705606 |
| IGF1         | 2.019733706  | 5.50E-06        | 0.0002857962079 |
| FOXA2        | 2.589288541  | 5.79E-12        | 4.78E-09        |
| MPDU1        | -2.603398234 | 6.87E-11        | 3.52E-08        |
| MOCS1        | 2.31008301   | 1.80E-05        | 0.0007153286937 |
| APCDD1L      | 2.011442845  | 3.32E-06        | 0.0001894755105 |
| LOC643719    | 2.035601236  | 1.24E-06        | 8.62E-05        |
| FLJ26850     | 2.796239338  | 1.15E-09        | 3.28E-07        |
| ZNF233       | 2.241797994  | 7.76E-15        | 1.05E-11        |
| DCC          | 2.099005525  | 7.03E-06        | 0.0003438425202 |
| GFRA1        | 2.64229934   | 3.86E-06        | 0.0002148385991 |
| STK32B       | 2.182546894  | 0.0001346812544 | 0.003243919159  |
| ZNF323       | -2.289883427 | 1.31E-06        | 9.03E-05        |
| RAB3C        | 2.091088632  | 4.97E-05        | 0.001596539354  |
| LOC100192378 | 2.035450441  | 0.0004807274152 | 0.008150919875  |
| ANKRD34C     | 2.038704609  | 0.0002361320294 | 0.004860329762  |
| PXDN         | 2.099191938  | 9.60E-05        | 0.002553273638  |
| GRM1         | 2.136089038  | 3.88E-09        | 8.73E-07        |
| ST8SIA5      | 2.185884752  | 5.16E-06        | 0.000270790369  |
| GRIP1        | 2.354499159  | 5.07E-06        | 0.0002700035102 |
| ZNF788       | 2.49486807   | 9.56E-06        | 0.0004384114588 |
| BSCL2        | -2.004937975 | 6.47E-05        | 0.00192650203   |
| HYDIN        | 2.335813156  | 1.02E-05        | 0.0004586875988 |
| ANO5         | 2.262902415  | 2.27E-05        | 0.0008667205056 |
| NRXN1        | 2.274467005  | 1.06E-09        | 3.15E-07        |
| STON2        | -2.053362826 | 3.64E-06        | 0.0002041711381 |

|           |              |                 |                 |
|-----------|--------------|-----------------|-----------------|
| KCNA1     | 2.349814746  | 2.71E-09        | 6.39E-07        |
| NT5E      | 2.387359258  | 8.11E-10        | 2.74E-07        |
| SFRP4     | 2.427233276  | 5.52E-07        | 4.54E-05        |
| LOC375196 | -3.1724186   | 1.16E-14        | 1.44E-11        |
| C12orf42  | 3.013294896  | 1.22E-10        | 5.49E-08        |
| DERL3     | -3.110517851 | 4.47E-08        | 5.83E-06        |
| AJAP1     | 2.356315188  | 6.70E-09        | 1.26E-06        |
| LHCGR     | 2.238387011  | 2.14E-08        | 3.21E-06        |
| MSX2      | 3.473861692  | 1.27E-17        | 3.13E-14        |
| UACA      | 2.80485812   | 7.55E-08        | 8.91E-06        |
| PCDHB1    | 2.094861829  | 2.42E-08        | 3.53E-06        |
| PCDHAC2   | 2.208584241  | 5.04E-05        | 0.001612317191  |
| LOC157627 | 2.809921822  | 6.59E-08        | 7.83E-06        |
| LOC400940 | 2.033486994  | 3.65E-09        | 8.35E-07        |
| ZNF610    | 2.072890313  | 8.41E-08        | 9.77E-06        |
| AMBN      | 2.099421222  | 2.12E-06        | 0.0001322189367 |
| GRIN3A    | 2.368610889  | 4.57E-07        | 3.88E-05        |
| C12orf56  | -2.185646275 | 0.0001009181994 | 0.002628393899  |
| SLITRK1   | 2.423154699  | 4.86E-08        | 6.12E-06        |
| GCM2      | 2.368289593  | 1.99E-06        | 0.0001250515751 |
| LIPE      | 2.250294079  | 6.70E-09        | 1.26E-06        |
| SYN3      | 2.083360735  | 1.56E-07        | 1.65E-05        |
| EDIL3     | 2.539134139  | 3.60E-15        | 5.95E-12        |
| GABRG1    | 2.148934087  | 2.20E-08        | 3.27E-06        |
| RPH3A     | 2.290367871  | 2.43E-06        | 0.0001486595896 |
| MMP3      | 2.295378321  | 5.67E-07        | 4.60E-05        |
| CDH19     | 2.480703664  | 9.54E-11        | 4.73E-08        |
| CDH18     | 2.606399553  | 3.69E-11        | 2.19E-08        |
| ALDH7A1   | 2.310159418  | 6.44E-06        | 0.0003199763855 |
| PDCL2     | 2.527921307  | 1.44E-05        | 0.0005885849813 |
| CDH10     | 2.294991742  | 1.55E-08        | 2.44E-06        |
| CATSPERB  | 2.837137294  | 1.04E-10        | 4.97E-08        |
| CCNA1     | 3.093253539  | 4.81E-07        | 4.07E-05        |
| SPO11     | -2.230567597 | 5.10E-06        | 0.0002705733302 |
| SLC22A16  | -2.087215359 | 4.87E-05        | 0.001566394664  |
| DLEC1     | -3.176266942 | 1.06E-08        | 1.80E-06        |
| MESP2     | -2.480114822 | 5.63E-08        | 6.84E-06        |
| C4orf35   | 2.074867607  | 1.07E-05        | 0.0004719870455 |

|         |              |          |                 |
|---------|--------------|----------|-----------------|
| SYCP2   | -4.515243082 | 5.35E-21 | 3.98E-17        |
| PCSK2   | 3.466644963  | 3.47E-14 | 3.96E-11        |
| MIR147  | 2.200197056  | 7.92E-07 | 6.13E-05        |
| GPR150  | -2.501442333 | 2.11E-09 | 5.21E-07        |
| ALX4    | 2.683115316  | 2.22E-12 | 1.94E-09        |
| ZNF85   | 2.270169201  | 1.50E-05 | 0.0006090253867 |
| CLVS1   | 2.043053376  | 4.94E-07 | 4.12E-05        |
| FLRT2   | 2.236143334  | 1.31E-09 | 3.60E-07        |
| ACSS3   | 2.216247452  | 8.99E-07 | 6.68E-05        |
| PTGFR   | 2.126920717  | 5.39E-09 | 1.11E-06        |
| STAC    | 2.443151284  | 4.01E-06 | 0.0002196503915 |
| CLDN17  | -2.139864789 | 8.56E-08 | 9.80E-06        |
| SOX30   | -2.415440685 | 6.49E-09 | 1.26E-06        |
| SGCZ    | 2.028874905  | 5.99E-07 | 4.78E-05        |
| ST8SIA4 | 3.722250628  | 9.69E-12 | 6.86E-09        |

**DEG\_St\_I**

| Genes     | logFC        | p-values | Adjusted p-values |
|-----------|--------------|----------|-------------------|
| ABCA17P   | 4.476868797  | 6.33E-06 | 0.003943248815    |
| ARHGEF33  | 4.467217613  | 1.14E-05 | 0.006030650822    |
| C11orf85  | 4.517068171  | 3.09E-13 | 3.17E-09          |
| C16orf73  | 6.845651847  | 1.16E-09 | 4.74E-06          |
| C17orf104 | 4.128009655  | 4.36E-06 | 3.19E-03          |
| C22orf45  | 4.064205793  | 6.44E-06 | 0.003943248815    |
| C2orf65   | 4.735199266  | 2.78E-05 | 0.008767662039    |
| COCH      | 5.411894228  | 3.00E-05 | 0.008915184204    |
| FOXE3     | 4.563062314  | 1.41E-07 | 0.0001698640085   |
| GPAT2     | 6.07098569   | 5.32E-06 | 0.003517757231    |
| KIAA1875  | 4.36841841   | 1.23E-06 | 0.001262441357    |
| MMP1      | -7.409096364 | 2.68E-06 | 0.002290852673    |
| MYO3A     | 6.154789605  | 1.42E-05 | 6.70E-03          |
| NOS2      | 8.201032795  | 3.40E-05 | 0.009853027643    |
| NTS       | 9.56793497   | 2.92E-05 | 0.00881560414     |
| PNLDC1    | 7.726154025  | 5.64E-08 | 7.70E-05          |
| SALL3     | 7.307314514  | 3.98E-09 | 1.16E-05          |
| SMC1B     | 7.214660791  | 1.36E-08 | 3.09E-05          |
| SOX2OT    | 4.955230539  | 3.21E-07 | 0.000365416106    |
| SYCP2     | 7.328427641  | 1.86E-10 | 9.52E-07          |

|       |             |          |                 |
|-------|-------------|----------|-----------------|
| TEX15 | 6.532558103 | 9.85E-08 | 0.0001261469344 |
| TLX3  | 7.168991117 | 9.79E-23 | 2.01E-18        |
| UGT8  | 4.188814321 | 2.75E-05 | 0.008767662039  |
| UPB1  | 4.107798152 | 1.29E-05 | 0.006388456547  |
| ZFR2  | 6.185871277 | 3.64E-09 | 1.16E-05        |

**DEG\_St\_II**

| Genes    | logFC        | p-values        | Adjusted p-values |
|----------|--------------|-----------------|-------------------|
| ABCA17P  | 5.86192631   | 5.98E-14        | 1.75E-10          |
| ADARB2   | 4.129046188  | 7.08E-07        | 0.000165980055    |
| ARNT2    | 4.08682466   | 1.68E-07        | 5.07E-05          |
| B4GALNT2 | 4.079242862  | 1.58E-04        | 0.00745078627     |
| BTNL9    | 4.008064864  | 2.01E-05        | 0.001881461395    |
| C1orf14  | 4.359336639  | 1.67E-18        | 3.42E-14          |
| C4orf7   | 6.738705999  | 8.08E-06        | 0.0009256807197   |
| CBLN2    | 4.162211433  | 3.57E-06        | 0.000526155433    |
| CCDC155  | 4.718717309  | 1.59E-12        | 2.72E-09          |
| CCL20    | 4.785931408  | 2.10E-06        | 0.0003707378131   |
| CDKN2A   | 4.756443669  | 1.62E-04        | 0.007482588368    |
| CEL      | 4.397757568  | 2.20E-04        | 8.87E-03          |
| CLDN10   | 5.250078597  | 4.19E-05        | 0.003012752186    |
| CLGN     | 4.027949716  | 1.43E-04        | 7.01E-03          |
| COL19A1  | 4.764812418  | 9.53E-09        | 4.65E-06          |
| COL4A4   | 4.289482942  | 2.90E-06        | 0.0004798575148   |
| COL4A6   | -4.292612923 | 4.51E-06        | 0.0006083366205   |
| CPA4     | -4.643946531 | 5.09E-05        | 0.003493321888    |
| CPEB1    | 4.588557513  | 1.10E-09        | 7.27E-07          |
| CR2      | 4.253834256  | 6.98E-05        | 0.004298070147    |
| CRB2     | 4.10177764   | 3.12E-07        | 8.53E-05          |
| CSMD1    | 4.526371775  | 7.61E-05        | 4.60E-03          |
| CTSE     | 4.207441091  | 5.36E-08        | 2.00E-05          |
| DMRTA2   | 5.121524402  | 6.04E-05        | 3.91E-03          |
| DSG1     | -7.203480329 | 5.76E-05        | 3.82E-03          |
| ENPP6    | 4.075941989  | 8.47E-08        | 2.80E-05          |
| FAM3B    | 4.809961036  | 5.96E-05        | 0.003889185977    |
| FOXJ1    | 4.459177056  | 0.0002426334431 | 0.009510952615    |
| GRIN2A   | 5.448855425  | 2.40E-07        | 6.94E-05          |
| GRIN2C   | 4.092039965  | 8.34E-12        | 1.22E-08          |

|           |              |                 |                 |
|-----------|--------------|-----------------|-----------------|
| HOXB13    | 4.750154768  | 3.49E-05        | 2.68E-03        |
| HS3ST4    | 5.035288928  | 4.40E-06        | 0.0005981634302 |
| IL17REL   | 4.174282793  | 4.22E-09        | 2.38E-06        |
| IRX6      | 4.224056329  | 2.02E-04        | 0.008488240946  |
| KCNB2     | 4.235385867  | 9.22E-10        | 6.30E-07        |
| KCNS1     | 4.535947633  | 1.94E-04        | 8.26E-03        |
| KEL       | 5.337023307  | 8.23E-11        | 7.34E-08        |
| KLK14     | -5.093888811 | 2.37E-04        | 0.009331251309  |
| KLK5      | -6.365412035 | 5.86E-05        | 0.003862819594  |
| KLK8      | -5.338332757 | 1.79E-04        | 0.007926142983  |
| KLK9      | -4.988392286 | 0.0002162551208 | 0.008799945034  |
| KRT14     | -5.509780206 | 8.77E-06        | 0.0009938906409 |
| KRT75     | -5.262445399 | 8.48E-05        | 0.004916054131  |
| KRTDAP    | -7.386611106 | 2.09E-05        | 0.001946946572  |
| LOC254559 | 5.19145807   | 2.41E-11        | 2.60E-08        |
| MAP7D2    | 5.874662065  | 7.49E-07        | 0.0001689656787 |
| MEI1      | 4.253472433  | 6.39E-08        | 2.18E-05        |
| MMP10     | -4.233876515 | 5.14E-05        | 0.003500654952  |
| MYO3A     | 6.752937355  | 3.68E-10        | 2.90E-07        |
| PAX1      | 5.295180105  | 1.27E-06        | 0.0002558048846 |
| RNF212    | 4.98849037   | 2.29E-06        | 3.94E-04        |
| RORB      | 4.90296433   | 4.84E-10        | 3.55E-07        |
| SIM2      | 4.117512237  | 7.40E-08        | 2.49E-05        |
| SLC7A2    | 4.314617518  | 3.72E-06        | 0.0005433850528 |
| SMC1B     | 7.236566264  | 2.63E-16        | 1.80E-12        |
| SOX30     | 4.830001157  | 1.90E-10        | 1.56E-07        |
| SPIB      | 4.174886887  | 6.14E-06        | 0.0007576810338 |
| STAG3     | 5.520418899  | 2.11E-11        | 2.40E-08        |
| SYCP2     | 5.32674452   | 8.78E-11        | 7.50E-08        |
| TAF7L     | 5.107754369  | 6.45E-13        | 1.20E-09        |
| TCAM1P    | 5.692694347  | 9.52E-12        | 1.30E-08        |
| TCP11     | 5.581882701  | 2.08E-09        | 1.25E-06        |
| TDRD10    | 4.344824517  | 4.02E-11        | 4.12E-08        |
| TEX15     | 5.743616865  | 4.34E-08        | 1.65E-05        |
| TLX3      | 4.21999266   | 8.20E-05        | 0.004845801689  |
| TRPV6     | 4.087928698  | 2.33E-05        | 0.002076158915  |
| UPB1      | 4.337469225  | 3.98E-10        | 3.02E-07        |
| WNK3      | 4.16138842   | 5.43E-09        | 2.86E-06        |

|        |             |          |                 |
|--------|-------------|----------|-----------------|
| YBX2   | 4.598365514 | 4.32E-06 | 0.0005946514241 |
| ZFR2   | 6.421496786 | 1.75E-14 | 6.56E-11        |
| ZNF541 | 6.318882816 | 1.92E-14 | 6.56E-11        |
| ZYG11A | 4.549989673 | 1.56E-05 | 0.001556252984  |

**DEG\_St\_III**

| Genes    | logFC        | p-values | Adjusted p-values |
|----------|--------------|----------|-------------------|
| ABCA17P  | 5.442220516  | 2.44E-10 | 1.51E-07          |
| ABCA3    | 4.418433933  | 6.67E-05 | 2.01E-03          |
| ADARB2   | 4.340776483  | 6.65E-07 | 6.86E-05          |
| AKR1B10  | -5.376303433 | 1.25E-07 | 2.10E-05          |
| AKR1B15  | -5.053638943 | 7.64E-08 | 1.50E-05          |
| AKR1C2   | -5.457694884 | 7.24E-06 | 0.0004159089052   |
| AKR1C3   | -4.018388997 | 1.99E-04 | 4.25E-03          |
| AMY1A    | 4.824171353  | 5.01E-06 | 3.16E-04          |
| ASCL4    | 4.126741314  | 3.02E-11 | 3.09E-08          |
| B4GALNT3 | -4.113756869 | 7.70E-07 | 7.62E-05          |
| BARX2    | -4.602569972 | 6.25E-07 | 6.50E-05          |
| BPIL2    | -4.645498856 | 2.82E-05 | 0.00107404609     |
| BTNL9    | 5.575512489  | 3.47E-07 | 4.39E-05          |
| C10orf99 | -4.25274413  | 6.14E-07 | 6.45E-05          |
| C11orf85 | 4.023926567  | 9.15E-22 | 6.25E-18          |
| C11orf92 | 6.846736198  | 5.37E-09 | 1.90E-06          |
| C1orf14  | 4.785481687  | 3.03E-15 | 1.24E-11          |
| C3orf15  | 4.219153457  | 1.43E-05 | 0.0006711132194   |
| C8G      | 4.687234745  | 9.64E-12 | 1.65E-08          |
| CASP14   | -5.203433417 | 1.54E-04 | 0.003601235578    |
| CCDC155  | 5.624225897  | 2.62E-21 | 1.34E-17          |
| CCNA1    | -5.330722831 | 1.27E-05 | 0.0006140560802   |
| CDA      | -4.757116021 | 4.17E-07 | 4.91E-05          |
| CDH16    | -4.589068321 | 7.90E-05 | 0.002264465993    |
| CDSN     | -5.944056172 | 9.30E-06 | 0.0004865320671   |
| CHRM3    | -4.499924807 | 1.65E-05 | 0.0007365522045   |
| CLCA2    | -4.171977031 | 2.46E-11 | 2.66E-08          |
| CLDN10   | 5.802808537  | 2.70E-05 | 0.001038940126    |
| CLDN3    | 5.713411444  | 3.17E-06 | 0.0002280067417   |
| CLGN     | 5.751047441  | 3.46E-09 | 1.31E-06          |
| CNFN     | -4.050630614 | 2.54E-05 | 9.97E-04          |

|          |              |                 |                 |
|----------|--------------|-----------------|-----------------|
| CNGB1    | -4.642103076 | 1.93E-05        | 8.12E-04        |
| CNTN1    | -4.278616539 | 4.14E-05        | 0.00141444369   |
| COL19A1  | 5.275238256  | 4.11E-06        | 2.73E-04        |
| COL4A4   | 4.012552106  | 4.68E-05        | 0.001542066872  |
| COL4A6   | -5.177458323 | 2.84E-08        | 7.46E-06        |
| CPA4     | -4.293401682 | 0.0001956061716 | 0.0042078931    |
| CRB2     | 5.606771588  | 1.04E-06        | 9.60E-05        |
| CRCT1    | -7.220119106 | 1.63E-07        | 2.46E-05        |
| CTSE     | 5.485070673  | 1.06E-07        | 1.89E-05        |
| CWH43    | -5.787489544 | 6.05E-05        | 0.001868104735  |
| CXCL14   | -5.354821302 | 6.93E-07        | 7.07E-05        |
| DEFB103B | -6.146343729 | 8.72E-06        | 4.76E-04        |
| DMKN     | -5.279046519 | 4.95E-09        | 1.78E-06        |
| DMRTA2   | 5.195822872  | 2.65E-04        | 0.005212717701  |
| DPF1     | -4.041394552 | 1.54E-07        | 2.39E-05        |
| DSC1     | -5.748600197 | 1.77E-06        | 0.0001439048327 |
| DSCR6    | 4.320988964  | 1.40E-05        | 6.61E-04        |
| DSG1     | -7.552103709 | 1.08E-08        | 3.40E-06        |
| EEF1A2   | -4.125934068 | 1.83E-04        | 0.004022848875  |
| ENDOU    | -4.052464889 | 1.62E-04        | 3.71E-03        |
| EPGN     | -4.681819053 | 8.85E-06        | 0.0004782971406 |
| EREG     | -4.31336421  | 5.66E-04        | 0.008984677848  |
| EYA2     | 4.157104862  | 1.35E-04        | 3.32E-03        |
| FABP5    | -4.821829052 | 1.10E-07        | 1.93E-05        |
| FAM25A   | -6.807120606 | 1.37E-08        | 4.19E-06        |
| FAM25B   | -4.497503696 | 1.46E-05        | 6.80E-04        |
| FKBP6    | 4.090031956  | 5.77E-07        | 6.10E-05        |
| FLRT3    | -5.578076852 | 4.80E-06        | 0.0003044583114 |
| GABRP    | 5.263805904  | 4.06E-04        | 7.05E-03        |
| GDPD2    | -4.63439494  | 9.26E-06        | 4.86E-04        |
| GJB6     | -5.877927587 | 6.79E-10        | 3.76E-07        |
| GOLGA7B  | -4.750253262 | 4.44E-10        | 2.60E-07        |
| GRIN2A   | 6.28053594   | 1.95E-08        | 5.56E-06        |
| GSDMA    | -4.359189432 | 6.43E-05        | 0.001956603027  |
| HEPHL1   | -5.888481868 | 3.84E-06        | 0.0002589532429 |
| HOXC13   | -4.721287807 | 2.20E-08        | 6.10E-06        |
| HSPB3    | -5.083787313 | 4.58E-07        | 5.25E-05        |
| IGFL1    | -5.618707849 | 4.15E-05        | 0.001414715257  |



|           |              |                 |                 |
|-----------|--------------|-----------------|-----------------|
| IL17REL   | 6.45861787   | 1.33E-09        | 6.01E-07        |
| IL1F5     | -4.723368044 | 1.53E-06        | 1.29E-04        |
| IL1F9     | -4.798169872 | 6.44E-06        | 3.78E-04        |
| IL24      | -4.817603663 | 8.05E-06        | 0.0004508711256 |
| INSM1     | 4.443235357  | 3.42E-06        | 2.39E-04        |
| IRX4      | -4.261395922 | 0.0001480583633 | 0.003517201051  |
| ISL1      | 4.210834843  | 0.0001882563283 | 0.004118935951  |
| IVL       | -4.763589203 | 4.40E-08        | 1.00E-05        |
| KCNA2     | 4.056860013  | 6.74E-07        | 6.91E-05        |
| KCNB2     | 4.027551417  | 1.19E-06        | 0.0001062643443 |
| KCNK10    | -4.678150893 | 1.83E-05        | 0.000788345458  |
| KCNS1     | 4.288581594  | 4.79E-04        | 0.007902893574  |
| KEL       | 6.639010588  | 8.40E-10        | 4.31E-07        |
| KLK10     | -5.244222196 | 6.33E-09        | 2.13E-06        |
| KLK12     | -5.983398448 | 6.13E-06        | 3.67E-04        |
| KLK13     | -6.046864984 | 3.66E-07        | 4.44E-05        |
| KLK5      | -8.271873617 | 9.55E-09        | 3.06E-06        |
| KLK6      | -7.050702511 | 3.89E-07        | 4.64E-05        |
| KLK7      | -8.21501996  | 7.45E-10        | 3.99E-07        |
| KLK8      | -7.465904814 | 5.99E-14        | 1.75E-10        |
| KLK9      | -6.924941546 | 3.78E-10        | 2.28E-07        |
| KPRP      | -4.699047232 | 3.18E-05        | 0.00117957012   |
| KRT14     | -6.23599695  | 5.82E-11        | 4.97E-08        |
| KRT16     | -5.464709344 | 5.29E-08        | 1.14E-05        |
| KRT1      | -6.190437443 | 1.19E-04        | 0.003040740922  |
| KRT23     | -4.159282915 | 0.0001000803192 | 0.002675415548  |
| KRT6B     | -4.186170827 | 7.08E-08        | 1.43E-05        |
| KRT6C     | -4.197101107 | 3.04E-07        | 3.90E-05        |
| KRT75     | -5.939424565 | 3.58E-06        | 0.0002468269425 |
| KRT9      | -4.359876983 | 1.39E-06        | 0.0001189739019 |
| KRTDAP    | -8.295302587 | 1.09E-10        | 8.00E-08        |
| LASS3     | -4.632438891 | 1.51E-11        | 2.21E-08        |
| LCE3D     | -6.323477244 | 7.87E-06        | 4.43E-04        |
| LCE3E     | -5.922831539 | 9.16E-06        | 0.0004853831326 |
| LOC541473 | 4.121795055  | 2.56E-06        | 0.0001886091413 |
| LY6G6C    | -4.652556116 | 3.23E-05        | 1.18E-03        |
| MAP7D2    | 5.069836684  | 7.38E-05        | 0.002153349037  |
| MGAT3     | 4.297482148  | 2.79E-05        | 0.001064514852  |

|          |              |                 |                 |
|----------|--------------|-----------------|-----------------|
| MMP1     | -4.895594764 | 7.35E-06        | 0.0004197261765 |
| MMP3     | -5.811604494 | 4.88E-06        | 0.0003085613783 |
| MYO3A    | 6.433562252  | 1.44E-07        | 2.33E-05        |
| NKX2-3   | 5.174609844  | 7.41E-06        | 0.0004208205332 |
| PAPL     | -4.684818518 | 8.34E-06        | 0.0004608890873 |
| PAX1     | 7.753526694  | 1.90E-10        | 1.28E-07        |
| PI3      | -4.903336178 | 9.36E-06        | 0.00048714577   |
| PITX2    | -5.700472218 | 4.16E-08        | 9.91E-06        |
| PKDCC    | 4.76502227   | 4.42E-06        | 2.88E-04        |
| PLA2G4E  | -5.246759138 | 2.38E-06        | 1.81E-04        |
| PLA2G4F  | -4.418017588 | 7.68E-08        | 1.50E-05        |
| PNLIPRP3 | -4.905619971 | 2.50E-04        | 0.005037393901  |
| PPP2R2C  | -4.655894972 | 9.15E-10        | 4.58E-07        |
| PRSS3    | -5.102085584 | 6.18E-05        | 1.90E-03        |
| PTHLH    | -5.289140808 | 2.11E-07        | 3.01E-05        |
| RANBP17  | 5.03666534   | 2.44E-08        | 6.68E-06        |
| RDH12    | -5.530271033 | 5.77E-07        | 6.10E-05        |
| RNASE7   | -5.343620626 | 9.79E-07        | 9.12E-05        |
| RNF128   | -4.913059276 | 7.89E-07        | 7.74E-05        |
| RNF150   | 4.011316653  | 4.26E-05        | 0.001446086373  |
| RNF222   | -4.421638271 | 9.25E-07        | 8.78E-05        |
| RORB     | 5.017985808  | 1.74E-06        | 1.42E-04        |
| RPL3L    | -4.02929383  | 1.53E-05        | 0.0006979758236 |
| S100A12  | -5.195681462 | 7.35E-06        | 0.0004197261765 |
| S100A7A  | -6.974017824 | 5.20E-06        | 3.25E-04        |
| S100A7   | -8.053876484 | 3.95E-08        | 9.63E-06        |
| SBSN     | -7.691349899 | 1.35E-10        | 9.53E-08        |
| SDR9C7   | -5.226885184 | 2.00E-07        | 2.87E-05        |
| SIM1     | 4.801732684  | 9.72E-10        | 4.63E-07        |
| SIM2     | 4.188261278  | 9.46E-06        | 4.91E-04        |
| SLC15A1  | -4.410915594 | 0.0001565219653 | 0.00364503622   |
| SLC35F3  | -4.208699678 | 1.80E-05        | 0.0007786383807 |
| SLC44A5  | -4.09564115  | 3.64E-07        | 4.44E-05        |
| SLC5A1   | -4.798150184 | 6.78E-05        | 0.002029434867  |
| SLC6A11  | -5.056611465 | 1.75E-05        | 7.68E-04        |
| SLC6A2   | -4.059857114 | 7.08E-05        | 0.002089641227  |
| SLITRK6  | -4.047814166 | 6.82E-05        | 2.04E-03        |
| SMC1B    | 7.822699671  | 2.29E-23        | 2.34E-19        |

|         |              |                 |                 |
|---------|--------------|-----------------|-----------------|
| SOX30   | 4.929069726  | 5.20E-11        | 4.84E-08        |
| SPIB    | 5.187326139  | 1.56E-05        | 0.0007089151106 |
| SPINK6  | -4.797961617 | 1.70E-04        | 0.003839028495  |
| SPINK7  | -4.849860643 | 1.57E-04        | 3.65E-03        |
| SPRR1A  | -5.97463794  | 1.60E-08        | 4.61E-06        |
| SPRR1B  | -6.243222227 | 7.19E-11        | 5.89E-08        |
| SPRR2A  | -5.06340904  | 3.54E-07        | 4.41E-05        |
| SPRR2B  | -6.746377089 | 7.50E-07        | 7.54E-05        |
| SPRR2C  | -4.792738607 | 1.60E-05        | 7.21E-04        |
| SPRR2D  | -5.942303347 | 2.23E-09        | 9.31E-07        |
| SPRR2E  | -6.443306001 | 9.19E-08        | 1.76E-05        |
| SPRR2F  | -5.38579013  | 6.86E-05        | 0.002040129764  |
| SPRR2G  | -7.314977809 | 6.23E-08        | 1.30E-05        |
| SPRR4   | -5.972844277 | 4.63E-06        | 0.0002963329911 |
| STAG3   | 6.906119276  | 5.12E-13        | 1.31E-09        |
| SV2B    | 4.047859137  | 1.57E-04        | 0.00364503622   |
| SYCE2   | 4.091409875  | 1.20E-09        | 5.61E-07        |
| SYCP2   | 6.028421208  | 2.84E-12        | 5.81E-09        |
| TAF7L   | 4.846093592  | 7.59E-10        | 3.99E-07        |
| TCAM1P  | 6.445567127  | 5.49E-11        | 4.89E-08        |
| TCP11   | 4.223421286  | 3.02E-04        | 5.71E-03        |
| TGM3    | -6.688001675 | 2.25E-04        | 0.004654820353  |
| TLX3    | 5.690424432  | 2.31E-07        | 3.16E-05        |
| TM4SF19 | -4.116597752 | 1.28E-06        | 0.0001118047898 |
| UBD     | 4.674440221  | 8.89E-05        | 0.002473616251  |
| UPB1    | 4.395215922  | 1.00E-07        | 1.82E-05        |
| USP2    | -4.149671448 | 3.08E-08        | 7.89E-06        |
| VCAM1   | 4.796297205  | 1.98E-05        | 0.0008214523026 |
| VSIG8   | -4.273370852 | 0.0005894738022 | 0.009246941034  |
| WFDC12  | -5.62349413  | 1.05E-05        | 0.0005284757643 |
| WSCD1   | 4.054600232  | 1.11E-07        | 1.93E-05        |
| XKR4    | 4.792374526  | 5.83E-08        | 1.23E-05        |
| YBX2    | 4.777904125  | 1.33E-05        | 0.0006360010956 |
| ZFR2    | 6.936356191  | 1.04E-23        | 2.13E-19        |
| ZNF541  | 6.615412146  | 2.37E-11        | 2.66E-08        |
| ZYG11A  | 4.604142616  | 2.53E-06        | 0.0001872084898 |

## DEG\_St\_IV

| Genes     | logFC        | p-values | Adjusted p-values |
|-----------|--------------|----------|-------------------|
| ABCA17P   | 4.447484611  | 6.55E-30 | 1.92E-26          |
| C4orf7    | 4.006273623  | 4.81E-06 | 8.46E-05          |
| COL4A6    | -4.147659185 | 6.47E-16 | 2.76E-13          |
| KCNS1     | 4.154241909  | 1.70E-11 | 2.25E-09          |
| KRTDAP    | -4.456610894 | 5.79E-09 | 3.27E-07          |
| LOC254559 | 4.056922947  | 2.80E-20 | 1.85E-17          |
| MYO3A     | 4.20439359   | 1.10E-10 | 1.05E-08          |
| SMC1B     | 6.773211239  | 3.89E-44 | 3.98E-40          |
| SOX30     | 4.277430767  | 9.37E-28 | 1.75E-24          |
| STAG3     | 5.477642572  | 5.85E-38 | 4.00E-34          |
| SYCP2     | 5.288044496  | 2.41E-29 | 6.17E-26          |
| TAF7L     | 4.118926744  | 1.24E-25 | 1.70E-22          |
| TCAM1P    | 4.95186132   | 1.63E-26 | 2.39E-23          |
| TCP11     | 4.754093097  | 3.73E-24 | 3.83E-21          |
| UPB1      | 4.079215098  | 2.54E-36 | 1.30E-32          |
| YBX2      | 4.159194322  | 7.69E-16 | 3.15E-13          |
| ZFR2      | 6.248095126  | 4.75E-57 | 9.74E-53          |
| ZNF541    | 5.065092752  | 8.90E-29 | 1.82E-25          |

**Supplementary Table 2.** Differentially methylated genes (DMG) comparing HPV+ and HPV- HNSCC as defined in the studies by Lechner et al. 2013 (GSE38266) and by Esposti et al. 2017 (GSE95036). Genes were selected by moderated t tests, and only those with significant p-values are shown. Adjusted p-values using FDR (<0.05) are also presented. Absolute log fold-change (logFC) values between HPV+ and HPV- are also shown. Probe IDs and gene symbols are also presented.

**GSE38266**

| Probe ID   | gene symbol | logFC        | p-values        | Adjusted p-values |
|------------|-------------|--------------|-----------------|-------------------|
| cg23614791 | ACSS3       | 2.072612107  | 5.99E-05        | 0.0132195963      |
| cg08702413 | ALDH7A1     | 1.939621003  | 0.002267548036  | 0.1048079903      |
| cg07402669 | APCDD1L     | 1.871962759  | 0.0002831138932 | 0.03266377874     |
| cg13702005 | C12orf42    | 2.438358461  | 0.0003244330983 | 0.03534755788     |
| cg15731056 | C12orf56    | -1.933600908 | 0.0007475424914 | 0.05822205942     |
| cg06806969 | C14orf162   | -1.527128434 | 3.86E-06        | 0.002493289313    |
| cg03364108 | C22orf45    | -2.103850657 | 0.0008046306636 | 0.06097023964     |
| cg16328106 | C2orf74     | 2.303234243  | 0.0005336352863 | 0.04811909682     |
| cg17495912 | CCNA1       | 2.696814892  | 0.0001782266359 | 0.02516712372     |
| cg16503924 | CDH18       | 2.148237377  | 0.0002447551648 | 0.03013259341     |
| cg16489926 | CDH19       | 1.646890411  | 1.30E-05        | 0.005295235555    |
| cg06831576 | CDH8        | 3.309685076  | 2.97E-06        | 0.002057877808    |
| cg24551579 | CLSTN1      | 2.028808636  | 1.37E-05        | 0.005325078043    |
| cg04996219 | CTNND2      | 2.995666243  | 0.0001728749776 | 0.02470093202     |
| cg11417653 | DERL3       | -2.729851527 | 1.22E-05        | 0.005130336051    |
| cg11499681 | DNAH9       | 2.538623271  | 1.47E-07        | 0.0002981046814   |
| cg15716405 | EDIL3       | 2.161200098  | 0.001119903847  | 0.07283095618     |
| cg02093112 | FBXO39      | 2.807966654  | 4.70E-07        | 0.000635469652    |
| cg02403395 | FGF12       | 1.980719607  | 0.001329584002  | 0.08008186721     |
| cg01537995 | FLRT2       | 1.69422199   | 0.0006636243434 | 0.05440026621     |
| cg05982485 | GABRA1      | 1.700348236  | 0.001239753391  | 0.07684803704     |
| cg14250833 | GCM2        | 1.696323827  | 0.01272947901   | 0.2609209965      |
| cg20972453 | GJB6        | 2.335315796  | 4.17E-08        | 0.0001223274652   |
| cg12864597 | GPR150      | -1.932187465 | 0.0003440888413 | 0.03680622442     |
| cg18794577 | GRIN3A      | 3.230590592  | 6.15E-07        | 0.0007527560476   |
| cg10071824 | GSX1        | 1.653542318  | 0.000755771068  | 0.05855231658     |
| cg07816687 | HSF4        | -2.530610498 | 4.97E-05        | 0.01182090957     |
| cg09918510 | HYDIN       | 2.085135844  | 0.00708901239   | 0.1938092424      |
| cg08235864 | IRX2        | 2.417927983  | 0.0001096346312 | 0.01921878722     |
| cg15638055 | KCNV1       | 1.836381003  | 2.75E-05        | 0.008195498157    |

|            |           |              |                 |                 |
|------------|-----------|--------------|-----------------|-----------------|
| cg12351433 | LHCGR     | 1.845553809  | 0.0001042780292 | 0.0187269947    |
| cg12877251 | LOC157627 | 1.606328042  | 0.01833743015   | 0.3112900462    |
| cg11176990 | LOC375196 | -2.076534035 | 0.0001154456462 | 0.01960130423   |
| cg22314787 | LOC400940 | 2.037441763  | 3.43E-06        | 0.002266126359  |
| cg12874181 | LOC401463 | 1.503604592  | 0.002511401688  | 0.1113072182    |
| cg07599133 | LOC643719 | 2.934343324  | 8.72E-07        | 0.000965885238  |
| cg22804236 | MEI1      | -2.615325388 | 0.0002647756893 | 0.03128561842   |
| cg22955973 | MME       | 4.167219005  | 8.95E-10        | 1.18E-05        |
| cg07182756 | MOCS1     | 1.857564803  | 0.0005143421445 | 0.04693942689   |
| cg12387713 | MSX2      | 2.61583615   | 3.26E-07        | 0.0005041203174 |
| cg07116393 | MUL1      | 2.109168267  | 0.0001437985554 | 0.0222653542    |
| cg22287064 | MYO15B    | -1.782487751 | 0.002633789799  | 0.1141748935    |
| cg01614020 | NEFL      | 2.186659881  | 0.0025578789    | 0.1120980884    |
| cg18201351 | NRXN1     | 1.523574219  | 0.0003789617183 | 0.03918050512   |
| cg16639665 | OPCML     | 1.66529862   | 0.0006773721739 | 0.05501814076   |
| cg12388309 | PAK7      | 2.403846799  | 0.0002563505649 | 0.03056808189   |
| cg27600205 | PCDH10    | 3.048816283  | 3.66E-06        | 0.002389515888  |
| cg02613108 | PCDH15    | 1.807637232  | 1.45E-06        | 0.001249482246  |
| cg25500080 | PCDHAC2   | 2.725600512  | 2.28E-08        | 9.01E-05        |
| cg06899976 | PCDHB1    | 1.727430092  | 8.87E-06        | 0.004236633901  |
| cg22504204 | PCSK2     | 1.70453339   | 0.02475996566   | 0.3527175132    |
| cg04633225 | PDX1      | 2.28741659   | 2.73E-05        | 0.008177071015  |
| cg13458645 | PITX2     | 2.865091071  | 9.83E-07        | 0.001025810185  |
| cg00735962 | PRKCB     | 1.530336881  | 0.002030597453  | 0.09879605255   |
| cg06029846 | PRMT8     | 2.218898344  | 0.0001704305332 | 0.02449242389   |
| cg23330451 | PRR23B    | 1.804582777  | 6.96E-07        | 0.0008179804996 |
| cg07136133 | PRR5L     | -1.614459585 | 0.001620400654  | 0.08874740235   |
| cg08261837 | RAB3C     | 1.949078343  | 1.44E-05        | 0.005442981338  |
| cg25439973 | RAD21L1   | 2.143371886  | 0.0002093129331 | 0.02753539137   |
| cg08661007 | ROBO1     | 1.775667093  | 1.07E-06        | 0.001051801042  |
| cg16403344 | RPH3A     | 1.873833416  | 0.001147413053  | 0.07372191635   |
| cg13901501 | RXRG      | 2.005881325  | 1.70E-05        | 0.006074972462  |
| cg15051226 | SCAND3    | 2.219243984  | 6.04E-06        | 0.003284503891  |
| cg26552774 | SERINC4   | -1.566115048 | 7.89E-06        | 0.003850725323  |
| cg16818993 | SFMBT2    | 1.531442636  | 8.61E-05        | 0.01679192747   |
| cg26337020 | ST8SIA4   | 2.731806926  | 8.19E-05        | 0.01618428103   |
| cg09275869 | ST8SIA5   | 1.767194191  | 0.0001965973331 | 0.02666322953   |
| cg24202123 | STAC      | 2.743483341  | 1.39E-05        | 0.005325078043  |

|            |         |              |                 |                 |
|------------|---------|--------------|-----------------|-----------------|
| cg10351287 | STK32B  | 2.05409794   | 0.001267020028  | 0.07774895628   |
| cg09462808 | SYNPR   | 1.523603797  | 0.0008546305434 | 0.06296463698   |
| cg05807991 | TRAM1L1 | 4.357750216  | 1.00E-09        | 1.18E-05        |
| cg12642431 | UACA    | 1.620893514  | 4.94E-06        | 0.002929417605  |
| cg24938830 | UNC80   | 1.885545464  | 0.0006393883616 | 0.05332892821   |
| cg13786089 | ZFR2    | -1.811137761 | 9.74E-06        | 0.004366157965  |
| cg07894352 | ZNF233  | 2.367323412  | 4.76E-08        | 0.0001308238173 |
| cg21138752 | ZNF323  | -2.945188228 | 3.03E-08        | 0.0001046773185 |
| cg07873812 | ZNF419  | 1.565674445  | 0.004055144608  | 0.1436298957    |
| cg27258025 | ZNF528  | 1.865558973  | 0.007847546805  | 0.2057353509    |
| cg25419914 | ZNF772  | 1.727995116  | 0.0008704479779 | 0.06323482926   |
| cg22411784 | ZNF773  | 2.17901169   | 1.72E-06        | 0.001368365071  |
| cg23216292 | ZNF85   | 1.773630671  | 0.0002507382945 | 0.03047225666   |
| cg16516691 | ZSWIM2  | 1.848898167  | 7.39E-07        | 0.0008512237563 |

**GSE95036**

| Probe ID   | gene symbol | logFC        | p-values        |
|------------|-------------|--------------|-----------------|
| cg09103619 | ANKRD34C    | 2.243467784  | 0.007093712779  |
| cg09968630 | ANO5        | 2.181750039  | 0.02800570427   |
| cg01175610 | BCL2L14     | -1.768987901 | 0.009237381339  |
| cg11711057 | BTBD11      | -1.584827012 | 0.00356615275   |
| cg06664258 | C12orf42    | 1.714757596  | 0.0155377225    |
| cg18407309 | CCL3        | 1.510279776  | 0.0003753546061 |
| cg21088983 | CLVS1       | 1.719243767  | 0.03967376941   |
| cg19613722 | DCC         | 1.819397514  | 0.01967908319   |
| cg25940946 | DERL3       | -2.539761699 | 0.01155486888   |
| cg20993403 | EPB41L1     | -2.309056992 | 0.02053387303   |
| cg02047489 | F2R         | 1.509755589  | 0.04844104318   |
| cg27207796 | FAM184B     | -2.604689997 | 0.0007428680546 |
| cg27397787 | FLJ26850    | 2.159494157  | 0.005145205793  |
| cg26597242 | GABRA1      | 1.961896957  | 0.003118654157  |
| cg18672939 | GFRA1       | 2.184793311  | 0.01420208545   |
| cg01446515 | GJB6        | 2.238303431  | 0.01024549576   |
| cg20086208 | GPR139      | 1.810825873  | 0.03857401694   |
| cg16617543 | GRAMD4      | -1.654585616 | 0.04299664737   |
| cg04539573 | GREM2       | 1.7289541    | 0.03858189245   |
| cg18794577 | GRIN3A      | 2.165037741  | 0.03858073778   |

|            |           |              |                 |
|------------|-----------|--------------|-----------------|
| cg14168923 | GSX1      | 1.755302031  | 0.04344901041   |
| cg01665823 | HIST1H2BE | -1.536629414 | 0.03342192421   |
| cg03472798 | HTR1E     | 2.028230266  | 0.009863346266  |
| cg08208133 | HTR3A     | 1.873064413  | 0.0008607513607 |
| cg16342115 | KLHL14    | 2.224785601  | 0.007528256744  |
| cg19403014 | LHCGR     | 2.351857819  | 0.009663120844  |
| cg15248835 | LOC157627 | 2.094657825  | 0.008390325723  |
| cg24603926 | MIR1178   | -1.723409588 | 0.03136116474   |
| cg12387713 | MSX2      | 2.041971535  | 0.01915717275   |
| cg15138846 | NAT1      | 1.505683895  | 0.04021881425   |
| cg07733800 | NCAM1     | 1.530103918  | 0.006044332722  |
| cg12832313 | PCDHAC2   | 2.145016613  | 0.01094884554   |
| cg26731781 | PDX1      | 2.103535388  | 0.01798173473   |
| cg16002355 | PITX2     | 2.343803349  | 0.01716874399   |
| cg00735962 | PRKCB     | 1.739552777  | 0.02827761898   |
| cg13177747 | RSPO2     | 1.559876001  | 0.02346895508   |
| cg22675486 | RXRG      | 3.348253641  | 0.0001581276535 |
| cg27136241 | SCAND3    | 2.409292401  | 0.01602879697   |
| cg16818993 | SFMBT2    | 2.017231643  | 0.02357684253   |
| cg06804921 | SLC6A5    | 2.178957195  | 0.001978004017  |
| cg22214414 | SYCP2     | -2.064359518 | 0.002388437366  |
| cg06314761 | SYNPR     | 1.707162612  | 0.01950292076   |
| cg11824639 | TCTEX1D1  | 1.747188785  | 0.02539177362   |
| cg07908508 | ZNF30     | 1.643590377  | 0.01724048749   |
| cg23989004 | ZNF709    | 1.538647484  | 0.002561627319  |
| cg21117673 | ZNF773    | 1.692732298  | 0.03060082021   |
